# Supplementary material for: Rhodamine-based cyclic hydrazide derivatives as fluorescent probes for selective and rapid detection of formaldehyde
Source: Royal Society of Chemistry journal article supplement (doi:10.1039/d2ra02104h), 2022-01-01

## SUPPORTING INFORMATION

### **Rhodamine-Based Cyclic Hydrazone Derivatives as Fluorescent Probes for Selective and Rapid Detection of Formaldehyde**

Sung Yeon Kim,<sup>†</sup> Sang-Hyun Park,<sup>†</sup> Chang-Hee Lee, Jinsung Tae\* and Injae Shin\*

Department of Chemistry, Yonsei University, Seoul 03722, Republic of Korea.

### CONTENTS

|                                   |     |
|-----------------------------------|-----|
| 1. General methods.....           | S2  |
| 2. Synthesis .....                | S2  |
| 3. Cell Study .....               | S13 |
| 3. Supplementary References ..... | S14 |
| 4. Supplementary Figures .....    | S15 |
| 5. NMR spectra .....              | S27 |

## General methods

**General synthetic materials and methods:** Silica gel 60 (230-400 mesh, Merck) was used for column chromatography. Analytical thin layer chromatography was performed using Merck 60 F254 silica gel (pre-coated sheets, 0.25 mm thick). All reagents and solvents were purchased from Sigma-Aldrich, TCI, Alfa and Acros, and used as received with the following exceptions. Dichloromethane ( $\text{CH}_2\text{Cl}_2$ ) was distilled from calcium hydride ( $\text{CaH}_2$ ) and tetrahydrofuran (THF) from sodium (Na) and benzophenone.

**Spectroscopic materials and methods:** Nuclear magnetic resonance (NMR) spectra were recorded in  $\text{CDCl}_3$  unless stated otherwise with internal references ( $\text{CDCl}_3$ ,  $\delta = 7.26$  ppm and TMS,  $\delta = 0.00$  ppm) at ambient temperature mainly on Bruker II-400 Fourier Transform Spectrometers operating at 400 MHz for  $^1\text{H}$  and at 100 MHz for  $^{13}\text{C}$ . Mass spectra were recorded on an Ultimate 3000 RS-Q-Exactive Orbitrap Plus mass spectrometer for both low resolution and high resolution mass spectra. The pH was recorded by HI-8014 instrument (HANNA). Infrared absorption spectra were recorded as a KBr pellet on a Vertex 70 FT-IR spectrophotometer. All UV-Vis spectra were measured with UV-visible spectrophotometer (V-650). Fluorescence spectrophotometer (LS 55) was used to obtain fluorescence emission spectrum in liquid state. The slit width was 10 nm for both excitation and emission. Samples were included in a 10.0 mm long quartz cuvette (3.5 ml volume). The photon multiplier voltage was 400 V and a circulating PBS buffer/DMSO bath was used during all experiments to regulate the temperature at 37 °C. The excitation-time emission spectrum at 520 nm was integrated over the range of 540-720 nm. All measurements were performed at least three times.

## Synthesis

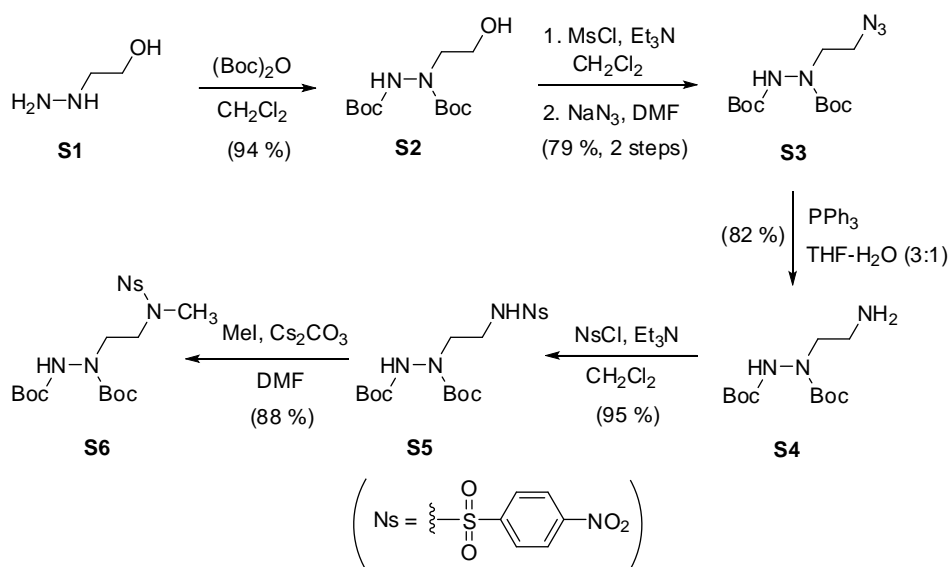

**Scheme S1.** Synthesis of compound **S6**.

**Compound S3:** To a solution of di-tert-butyl 1-(2-hydroxyethyl)hydrazine-1,2-dicarboxylate (**S2**, ref 1) (1.94 g, 7 mmol) in CH<sub>2</sub>Cl<sub>2</sub> (50 mL) were added Et<sub>3</sub>N (1.5 mL, 14 mmol) and MsCl (1.26 g, 11 mmol) at -78 °C. After stirring for 10 min at the same temperature, the reaction was quenched by addition of water (50 mL). The organic layer was extracted with CH<sub>2</sub>Cl<sub>2</sub> (50 mL x3), washed with brine, dried over MgSO<sub>4</sub>, filtered, and concentrated in vacuo. The crude product was treated with sodium azide (670 mg, 10 mmol). After stirring for 2 h at 90 °C, the mixture was cooled to room temperature. The organic layer was extracted with ethyl acetate (100 mL x3), washed with brine, dried over MgSO<sub>4</sub>, filtered, and concentrated in vacuo. The crude product was purified by flash column chromatography (hexane : ethyl acetate = 4:1) to give **S3** as a white solid (1.66 g, 79%). <sup>1</sup>H NMR (400 MHz, CDCl<sub>3</sub>): δ 6.43 (s, 1H), 3.64 (bs, 2H), 3.45 (bs, 2H), 1.46 (s, 18H); <sup>13</sup>C NMR (100 MHz, CDCl<sub>3</sub>): δ 155.4, 155.1, 81.8, 49.8, 49.0, 28.3; IR (film, cm<sup>-1</sup>) 3317, 2982, 2937, 2161, 2083, 1733, 1706, 1492, 1397, 1366, 1318, 1302, 1258, 1146; HRMS (FAB) *m/z* calcd for C<sub>12</sub>H<sub>23</sub>N<sub>5</sub>O<sub>4</sub> [(M+H)<sup>+</sup>] 302.1822; found 302.1816.

**Compound S4:** To a solution of **S3** (733 mg, 2.43 mmol) in THF (25 mL) at 0 °C was slowly added triphenylphosphine (957 mg, 1.5 mmol), After stirring for 4 h at room temperature, water (8.3 mL) was added to the mixture slowly. After stirring for additional 16 h, the volatile materials were removed under reduced pressure. The residues were purified by flash column chromatography (CH<sub>2</sub>Cl<sub>2</sub> : methanol = 8:1) to give **S4** as a white solid (549 mg, 82%). <sup>1</sup>H NMR (400 MHz, CDCl<sub>3</sub>): δ 6.77 (bs, 1H), 3.51 (bs, 2H), 2.87 (t, *J* = 5.6 Hz, 2H), 2.64 (bs, 2H), 1.45 (s, 18H); <sup>13</sup>C NMR (100 MHz, CDCl<sub>3</sub>): δ 155.8, 81.5, 51.9, 39.7, 28.3; IR (film, cm<sup>-1</sup>) 3482, 3360, 3305, 3006, 2977, 2931, 1728, 1701, 1410, 1394, 1256, 1154, 1127; HRMS (FAB) *m/z* calcd for C<sub>12</sub>H<sub>25</sub>N<sub>3</sub>O<sub>4</sub> [(M+H)<sup>+</sup>] 276.1917; found 276.1912.

**Compound S5:** To a solution of **S4** (380 mg, 1.3 mmol) in CH<sub>2</sub>Cl<sub>2</sub> (12.2 mL) were added TEA (0.3 mL, 1.97 mmol) and 4-nitrobenzenesulfonyl chloride (353 mg, 1.59 mmol) at room temperature. After stirring for 30 min at the same temperature, the solvent was removed under reduced pressure. The crude product was purified by flash column chromatography (hexane : ethyl acetate = 3:1) to give **S5** as a yellow solid (562 mg, 95%). <sup>1</sup>H NMR (400 MHz, CDCl<sub>3</sub>): δ 8.32 (d, *J* = 8.8 Hz, 2H), 8.04 (d, *J* = 8.8 Hz, 2H), 3.55 (bs, 2H), 3.17 (bs, 2H), 1.43 (d, *J* = 10.8 Hz, 18H); <sup>13</sup>C NMR (100 MHz, CDCl<sub>3</sub>): δ 154.9, 150.0, 146.6, 128.4, 124.4, 82.7, 50.3, 41.2, 28.2; IR (film, cm<sup>-1</sup>) 3325, 3108, 3069, 2981, 2935, 2872, 1713, 1533, 1479, 1457, 1369, 1350, 1287, 1254, 1164, 1093; HRMS (FAB) *m/z* calcd for C<sub>18</sub>H<sub>28</sub>N<sub>4</sub>O<sub>8</sub>S [(M+H)<sup>+</sup>] 461.1700; found 461.1691.

**Compound S6:** To a solution of **S5** (547 mg, 1.09 mmol) in DMF (46 mL) were added a cesium carbonate (767 mg, 2.41 mmol) and methyl iodide (0.09 mL, 1.31 mmol) at room temperature. After

stirring overnight at the same temperature, the mixture was brought to pH 7 by addition of saturated aqueous ammonium chloride. The aqueous layer was extracted with ethyl acetate several times. The combined organic layers were washed with brine, dried over MgSO<sub>4</sub>, filtered, and concentrated in vacuo to give **S6** as a yellow solid (460 mg, 88 %). <sup>1</sup>H NMR (400 MHz, CDCl<sub>3</sub>): δ 8.36 (d, *J* = 8.8 Hz, 2H), 7.97 (d, *J* = 8.8 Hz, 2H), 3.66 (bs, 2H), 3.25 (bs, 2H), 2.86 (s, 3H), 1.47 (s, 18H); <sup>13</sup>C NMR (100 MHz, CDCl<sub>3</sub>): δ 155.3, 150.2, 144.3, 128.4, 124.6, 81.7, 81.4, 47.6, 46.1, 34.9, 28.4; IR (film, cm<sup>-1</sup>) 3304, 3110, 3039, 2981, 2934, 2870, 2821, 1737, 1709, 1668, 1606, 1532, 1478, 1312, 1278, 1247, 1169, 1148, 1089; HRMS (FAB) *m/z* calcd for C<sub>19</sub>H<sub>30</sub>N<sub>4</sub>O<sub>8</sub>S [(M+H)<sup>+</sup>] 475.1857; found 475.1849.

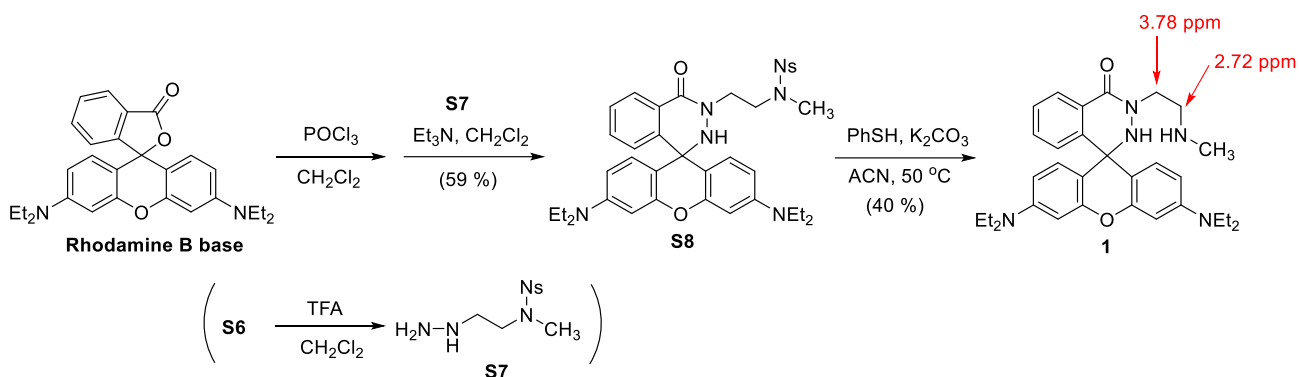

**Scheme S2.** Synthesis of probe 1.

**Compound S7:** To a solution of **S6** (448 mg, 0.93 mmol) in CH<sub>2</sub>Cl<sub>2</sub> (5 mL) was slowly added a solution of trifluoroacetic acid (10 ml) in CH<sub>2</sub>Cl<sub>2</sub> (5 mL). After stirring for 30 min, the volatile materials were removed under reduced pressure to give **S7**, which was used for the next step without purification.

**Compound S8:** To a solution of rhodamine B base (274 mg, 0.62 mmol) in dichloromethane (5 mL) was added phosphorus oxychloride (0.15 mL, 1.7 mmol) dropwise over 2 min. The mixture was heated under reflux for 3 h. The reaction mixture was cooled to room temperature. The volatile materials were removed under reduced pressure to give rhodamine B acid chloride, which was used for the next step without purification.<sup>2</sup>

To a solution of the above rhodamine B acid chloride in CH<sub>2</sub>Cl<sub>2</sub> (2 mL) was added slowly a solution of the crude **S7** and TEA (0.60 mL, 4.3 mmol) in CH<sub>2</sub>Cl<sub>2</sub> (2.3 mL) at 0 °C. After stirring overnight at room temperature, the mixture was brought to pH 7 by addition of saturated aqueous ammonium chloride. The aqueous layers were extracted with ethyl acetate several times. The combined organic layers were dried over MgSO<sub>4</sub>, filtered, and concentrated in vacuo. The crude product was purified by flash column chromatography (hexane : ethyl acetate = 2:1) to give **S8** as a pink solid (256 mg, 59%). <sup>1</sup>H NMR (400 MHz, CDCl<sub>3</sub>): δ 8.27-8.29 (m, 2H), 8.20-8.21 (m, 1H), 7.86-7.89 (m, 2H), 7.43-7.45

(m, 2H), 7.03-7.06 (m, 1H), 6.68 (d,  $J = 8.8$  Hz, 2H), 6.42-6.69 (m, 2H), 6.31-6.41 (m, 1H), 6.28-6.31 (m, 2H), 3.53 (t,  $J = 6.4$  Hz, 2H), 3.34-3.31 (m, 8H), 2.96 (t,  $J = 6.4$  Hz, 2H), 2.62 (s, 3H), 1.14-1.18 (m, 12H);  $^{13}\text{C}$  NMR (100 MHz,  $\text{CDCl}_3$ ):  $\delta$  165.0, 154.0, 153.3, 150.0, 148.7, 144.2, 144.1, 132.5, 129.5, 129.2, 128.6, 128.4, 127.8, 127.8, 127.6, 124.4, 124.3, 109.6, 108.1, 107.2, 98.9.

**Probe 1:** To a solution of **S8** (41 mg, 0.06 mmol) in acetonitrile (3 mL) were added potassium carbonate (12 mg, 0.087 mmol) and thiophenol (0.008 mL, 0.087 mmol). The mixture was heated under reflux for 4 h. After cooling to room temperature, the solvent was removed under reduced pressure. The residues were purified by flash column chromatography (dichloromethane : methanol = 13:1) to give **1** as a pink solid (12 mg, 40%).  $^1\text{H}$  NMR (400 MHz,  $\text{CDCl}_3$ ):  $\delta$  8.19-8.21 (m, 1H), 7.44-7.46 (m, 2H), 7.06-7.08 (m, 1H), 6.71 (d,  $J = 7.2$  Hz, 2H), 6.44 (d,  $J = 4.4$  Hz, 2H), 6.28-6.31 (m, 2H), 3.78 (t,  $J = 4.4$  Hz, 2H), 3.35 (q,  $J = 7.2$  Hz, 8H), 2.72 (t,  $J = 4.4$  Hz, 2H), 2.36 (s, 3H), 1.16 (t,  $J = 6.8$  Hz, 12H);  $^{13}\text{C}$  NMR (100 MHz,  $\text{CDCl}_3$ ):  $\delta$  165.1, 153.4, 149.0, 143.7, 132.3, 129.5, 129.5, 128.0, 127.8, 127.5, 109.5, 106.9, 98.7, 58.5, 49.0, 46.4, 44.5, 35.5, 12.7; IR (film,  $\text{cm}^{-1}$ ) 3589, 3434, 3060, 2970, 2930, 2871, 1736, 1686, 1633, 1614, 1544, 1514, 1459, 1306, 1274, 1233, 1222; HRMS (FAB)  $m/z$  calcd for  $\text{C}_{31}\text{H}_{39}\text{N}_5\text{O}_2$  [(M+H) $^+$ ] 514.3176; found 514.3173.

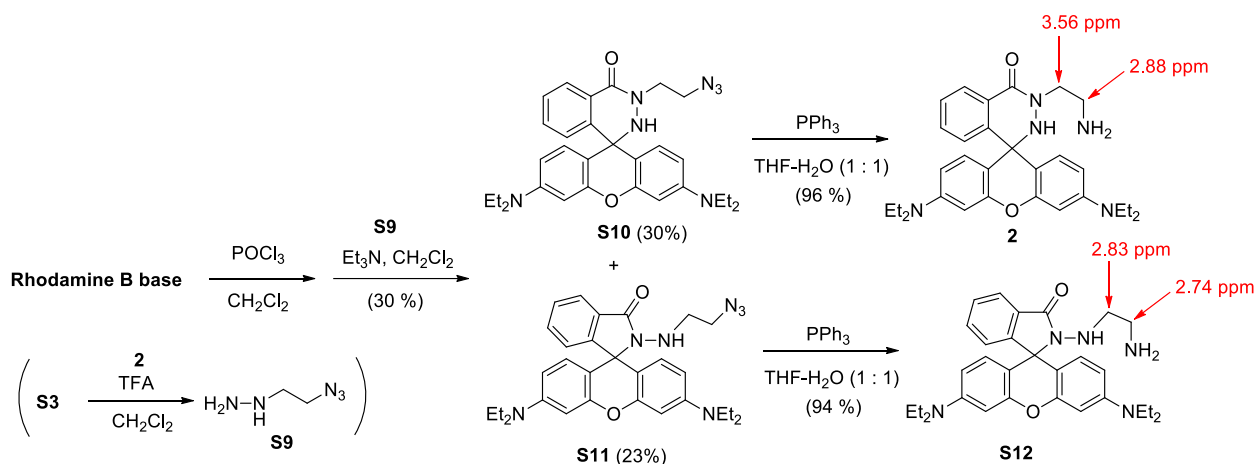

**Scheme S3.** Synthesis of probes **2** and **S12**.

**Compound S9 :** To a solution of **S3** (100 mg, 0.33 mmol) in  $\text{CH}_2\text{Cl}_2$  (4.5 mL) was slowly added a solution of trifluoroacetic acid (4.5 mL) in  $\text{CH}_2\text{Cl}_2$  (4.5 mL). After stirring for 30 min, the volatile materials were removed under reduced pressure to give **S9**, which was used for the next step without purification.

**Compound S10 and S11:** To a solution of rhodamine B base (71 mg, 0.16 mmol) in dichloromethane (2 mL) was added phosphorus oxychloride (0.039 mL, 0.44 mmol) dropwise over 2 min. The solution was heated under reflux for 3 h. The reaction mixture was cooled to room temperature and the volatile

materials were removed under reduced pressure to give rhodamine B acid chloride.

To a solution of the above rhodamine B acyl chloride in CH<sub>2</sub>Cl<sub>2</sub> (1 mL) at 0 °C was slowly added a solution of **S9** (33 mg, 0.32 mmol) and TEA (0.22 mL, 1.6 mmol) in CH<sub>2</sub>Cl<sub>2</sub> (1.5 mL) at room temperature. After stirring overnight at the same temperature, the mixture was brought to pH 7 by addition of saturated aqueous ammonium chloride. Aqueous layers were extracted with ethyl acetate several times. The combined organic layers were dried over MgSO<sub>4</sub>, filtered, and concentrated in vacuo. The crude product was purified by flash column chromatography (hexane : ethyl acetate = 6:1) to give **S10** (25 mg, 30%) and the 5-membered **S11** (19 mg, 23%) as pink solids.

**6-Membered azide compound S10:** <sup>1</sup>H NMR (400 MHz, CDCl<sub>3</sub>): δ 8.25-8.27 (m, 1H), 7.45-7.47 (m, 2H), 7.09-7.11 (m, 1H), 6.68 (d, *J* = 8.8 Hz, 2H), 6.48 (d, *J* = 2.4 Hz, 2H), 6.28-6.31 (m, 2H), 4.53(bs, 1H), 3.54 (t, *J* = 6.8 Hz, 2H), 3.35 (q, *J* = 6.8 Hz, 8H), 3.05 (t, *J* = 6.8 Hz, 2H), 1.16 (t, *J* = 6.8 Hz, 12H); <sup>13</sup>C NMR (100 MHz, CDCl<sub>3</sub>): δ 164.8, 153.4, 149.0, 143.9, 132.4, 129.4, 129.4, 128.0, 127.8, 127.6, 109.4, 106.8, 98.7, 58.6, 47.8, 47.0, 44.5, 12.7; **IR** (film, cm<sup>-1</sup>) 3185, 2967, 2931, 2897, 2870, 2099, 1686, 1649, 1633, 1613, 1574, 1544, 1509, 1480, 1230, 1219, 1203, 1121, 1095, 1077; **HRMS** (FAB) *m/z* calcd for C<sub>30</sub>H<sub>35</sub>N<sub>7</sub>O<sub>2</sub> [(M+H)<sup>+</sup>] 526.2925; found 526.2916.

**5-Membered azide compound S11:** <sup>1</sup>H NMR (400 MHz, CDCl<sub>3</sub>): δ 7.91-7.93 (m, 1H), 7.45-7.51 (m, 2H), 7.13-7.45 (m, 1H), 6.40-6.42 (m, 2H), 6.26-6.29 (m, 2H), 4.32 (bs, 1H), 3.34 (q, *J* = 7.2 Hz, 8H), 2.97 (t, *J* = 6.4 Hz, 2H), 2.77-2.79 (m, 2H), 1.16 (t, *J* = 6.8 Hz, 12H).

**Probe 2:** To a solution of **S10** (25 mg, 0.05 mmol) in THF (0.9 mL) at 0 °C was slowly added a triphenylphosphine (18.7 mg, 0.07 mmol) at room temperature. After stirring for 4 h, water (0.9 mL) was added to the mixture. After stirring for additional 16 h, the solvent was removed under reduced pressure. The residues were purified by flash column chromatography (dichloromethane : methanol = 10:1) to give **2** as a light pink solid (23 mg, 96%). <sup>1</sup>H NMR (400 MHz, CDCl<sub>3</sub>): δ 8.13-8.15 (m, 1H), 7.28-7.37 (m, 2H), 6.98 (d, *J* = 8.8 Hz, 1H), 6.67 (d, *J* = 8.8 Hz, 2H), 6.41 (bd, 2H), 6.20-6.22 (m, 2H), 3.56 (bs, 2H), 3.20 (bq, 8H), 2.88 (bs, 2H), 1.12 (t, *J* = 6.8 Hz, 12H); <sup>13</sup>C NMR (100 MHz, CDCl<sub>3</sub>): δ 165.5, 153.5, 149.0, 143.8, 132.3, 129.5, 129.4, 128.0, 127.8, 127.5, 109.6, 106.9, 98.8, 58.5, 50.5, 44.6, 39.5, 12.7; **IR** (film, cm<sup>-1</sup>) 3436, 2969, 2929, 2895, 2869, 1737, 1633, 1614, 1574, 1545, 1513, 1321, 1305, 1273, 1222, 1152; **HRMS** (FAB) *m/z* calcd for C<sub>30</sub>H<sub>37</sub>N<sub>5</sub>O<sub>2</sub> [(M+H)<sup>+</sup>] 500.3020; found 500.3033.

**5-Membered amine compound S12:** To a solution of **S11** (19 mg, 0.04 mmol) in THF (0.6 mL) at 0 °C was slowly added a triphenylphosphine (14.9 mg, 0.06 mmol) at room temperature. After stirring for 4 h, water (0.6 mL) was added to the mixture. After stirring for additional 16 h, the solvent was removed under reduced pressure. The residues were purified by flash column chromatography (dichloromethane : methanol = 10:1) to give **S12** as a light pink solid (18 mg, 94%). <sup>1</sup>H NMR (400 MHz, CDCl<sub>3</sub>): δ 7.87-7.89 (m, 1H), 7.46-7.54 (m, 2H), 7.12 (d, *J* = 8.0 Hz, 1H), 6.37-6.39 (m, 4H),

6.24-6.27 (m, 2H), 3.96 (s, 1H), 3.34 (q,  $J = 6.8$  Hz, 8H), 2.84 (bt, 2H), 2.75 (bt, 2H), 1.16 (t,  $J = 6.8$  Hz, 12H);  $^{13}\text{C}$  NMR (100 MHz,  $\text{CDCl}_3$ ):  $\delta$  168.7, 153.9, 151.6, 149.4, 133.6, 129.5, 128.8, 128.4, 124.1, 123.5, 108.6, 103.9, 98.0, 66.48, 45.9, 44.6, 37.5, 12.7; IR (film,  $\text{cm}^{-1}$ ) 3434, 2967, 2926, 2870, 1689, 1634, 1615, 1515, 1466, 1526, 1329, 1264, 1232, 1119, 1020; HRMS (FAB)  $m/z$  calcd for  $\text{C}_{30}\text{H}_{37}\text{N}_5\text{O}_2$   $[(\text{M}+\text{H})^+]$  500.3020; found 499.2941.

## 6-Membered ring structures of probes 1 and 2

A chemical shift of  $\text{CH}_2$  attached to amide N in the 6-membered probe 2 in the  $^1\text{H}$  NMR spectrum is assigned to 3.56 ppm, but that of the corresponding  $\text{CH}_2$  in 5-membered compound S12 to 2.83 ppm. In addition, a chemical shift of  $\text{CH}_2$  attached to amide N in the 6-membered probe 1 in the  $^1\text{H}$  NMR spectrum is assigned to 3.78 ppm that is similar to that of probe 2. On these bases, probes 1 and 2 have the 6-membered ring structures.

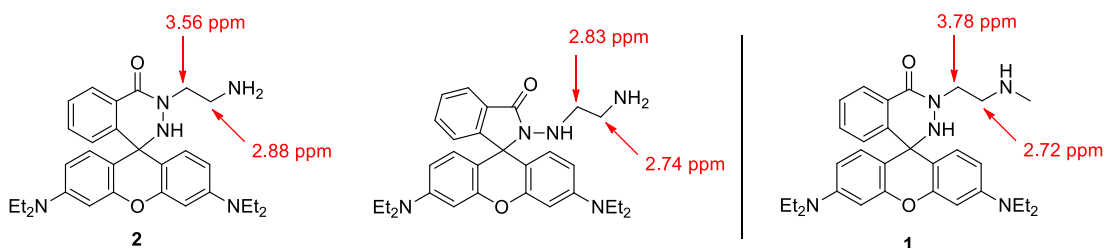

**Fluorescence response of 1 to various analytes.** RCS, ROS, and metal cations were prepared according to the following methods. 100  $\mu\text{M}$  analytes (otherwise specified) were added to 10  $\mu\text{M}$  **1** in 20 mM PBS buffer (DMSO 1%) at 37 °C throughout the experiment.<sup>3,4</sup>

- (1) **Acetaldehyde**: 1  $\mu\text{L}$  of 200 mM stock solution of acetaldehyde in distilled  $\text{H}_2\text{O}$  was added to 1999  $\mu\text{L}$  of a 10  $\mu\text{M}$  probe solution in PBS
- (2) **Benzaldehyde**: 1  $\mu\text{L}$  of 200 mM stock solution of benzaldehyde in DMSO was added to 1999  $\mu\text{L}$  of a 10  $\mu\text{M}$  probe solution in PBS
- (3) **4-Hydroxybenzaldehyde**: 1  $\mu\text{L}$  of 200 mM stock solution of 4-hydroxybenzaldehyde in DMSO was added to 1999  $\mu\text{L}$  of a 10  $\mu\text{M}$  probe solution in PBS
- (4) **Ethyl pyruvate**: 1  $\mu\text{L}$  of 200 mM stock solution of ethyl pyruvate in distilled  $\text{H}_2\text{O}$  was added to 1999  $\mu\text{L}$  of a 10  $\mu\text{M}$  probe solution in PBS
- (5) **Ethyl glyoxalate**: 1  $\mu\text{L}$  of 200 mM stock solution of ethyl glyoxalate in DMSO was added to 1999  $\mu\text{L}$  of a 10  $\mu\text{M}$  probe solution in PBS
- (6) **Propionaldehyde**: 1  $\mu\text{L}$  of 200 mM stock solution of propionaldehyde in DMSO was added to 1999  $\mu\text{L}$  of a 10  $\mu\text{M}$  probe solution in PBS
- (7) **D-glucose (1mM)**: : 1  $\mu\text{L}$  of 2 M stock solution of D-glucose in distilled  $\text{H}_2\text{O}$  was added to 1999  $\mu\text{L}$  of a 10  $\mu\text{M}$  probe solution in PBS
- (8)  **$\text{H}_2\text{O}_2$** : 1  $\mu\text{L}$  of 200 mM stock solution of  $\text{H}_2\text{O}_2$  in distilled  $\text{H}_2\text{O}$  was added to 1999  $\mu\text{L}$  of a 10  $\mu\text{M}$  probe solution in PBS
- (9) **HOCl**: 1  $\mu\text{L}$  of 200 mM stock solution of sodium hypochlorite in 0.1M NaOH (aq) was added to 1999  $\mu\text{L}$  of a 10  $\mu\text{M}$  probe solution in PBS
- (10)  **$\text{NO}^\bullet$** : 1  $\mu\text{L}$  of 200 mM stock solution of SNP (sodium nitroferricyanide(III) dihydrate) in distilled  $\text{H}_2\text{O}$  was added to 1999  $\mu\text{L}$  of a 10  $\mu\text{M}$  probe solution in PBS
- (11)  **$^1\text{O}_2$** : 1  $\mu\text{L}$  of 200 mM stock solution of sodium hypochlorite in 1 mM  $\text{H}_2\text{O}_2$  was added to 1999  $\mu\text{L}$  of a 10  $\mu\text{M}$  probe solution in PBS
- (12)  **$\text{O}_2^{\bullet-}$** : 1  $\mu\text{L}$  of 200 mM stock solution of potassium superoxide in DMSO was added to 1999  $\mu\text{L}$  of a 10  $\mu\text{M}$  probe solution in PBS
- (13)  **$\bullet\text{OH}$** :  $\text{CuCl}_2$  (copper(II) chloride) was dissolved in  $\text{H}_2\text{O}$  and  $\text{H}_2\text{O}_2$  was diluted in  $\text{H}_2\text{O}$  respectively. 1  $\mu\text{L}$  of 200 mM stock solution ( $\text{CuCl}_2$  solution: $\text{H}_2\text{O}_2$  solution =1:10) was added to 1999  $\mu\text{L}$  of a 10  $\mu\text{M}$  probe solution in PBS
- (14)  **$\text{Cu}^{2+}$** : 1  $\mu\text{L}$  of 200 mM stock solution of  $\text{CuCl}_2 \cdot 2\text{H}_2\text{O}$  in distilled  $\text{H}_2\text{O}$  was added to 1999  $\mu\text{L}$  of a 10  $\mu\text{M}$  probe solution in PBS
- (15)  **$\text{Fe}^{2+}$** : 1  $\mu\text{L}$  of 200 mM stock solution of  $\text{FeSO}_4 \cdot 7\text{H}_2\text{O}$  in distilled  $\text{H}_2\text{O}$  was added to 1999  $\mu\text{L}$  of a 10  $\mu\text{M}$  probe solution in PBS
- (16)  **$\text{Fe}^{3+}$** : 1  $\mu\text{L}$  of 200 mM stock solution of  $\text{Fe}_2(\text{SO}_4)_3$  in distilled  $\text{H}_2\text{O}$  was added to 1999  $\mu\text{L}$  of a 10  $\mu\text{M}$  probe solution in PBS



- (17) **K<sup>+</sup>**: 1  $\mu\text{L}$  of 200 mM stock solution of  $\text{KCOOCH}_3$  in distilled  $\text{H}_2\text{O}$  was added to 1999  $\mu\text{L}$  of a 10  $\mu\text{M}$  probe solution in PBS
- (18) **Zn<sup>2+</sup>**: 1  $\mu\text{L}$  of 200 mM stock solution of  $\text{Zn}(\text{NO}_3)_2 \cdot 6\text{H}_2\text{O}$  in distilled  $\text{H}_2\text{O}$  was added to 1999  $\mu\text{L}$  of a 10  $\mu\text{M}$  probe solution in PBS
- (19) **FA**: 1  $\mu\text{L}$  of 200 mM stock solution of formaldehyde in distilled  $\text{H}_2\text{O}$  was added to 1999  $\mu\text{L}$  of a 10  $\mu\text{M}$  probe solution in PBS

## Isolation of the reaction product of **1** with FA

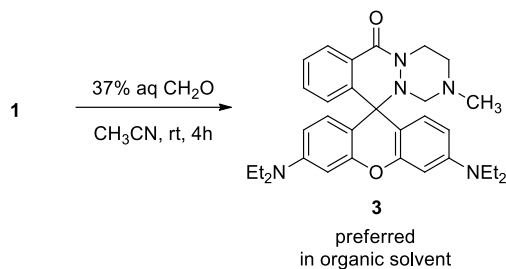

**Compound 3** : To a solution of **1** (30 mg, 0.040 mmol) in acetonitrile (3 mL) was slowly added formaldehyde (0.30 mL, 10.7 mmol). The mixture was stirred for 4 h at room temperature. The solvent was evaporated under vacuum and purified by flash column chromatography (dichloromethane : methanol = 20:1) to give **3** as a pink solid. **<sup>1</sup>H NMR** (400 MHz, CDCl<sub>3</sub>): δ 8.26-8.29 (m, 1H), 7.44-7.49 (m, 2H), 7.12-7.14 (m, 1H), 6.71 (d, *J* = 8.8 Hz, 2H), 6.46 (d, *J* = 2.4 Hz, 2H), 6.26-6.29 (m, 2H), 3.70-3.71 (bt, 2H), 3.31-3.37 (m, 8H), **3.24 (s, 2H, CH<sub>2</sub>)**, 2.56 (bt, 2H), 2.14 (s, 3H), 1.16 (t, *J* = 7.2 Hz, 12H); **<sup>13</sup>C NMR** (100 MHz, CDCl<sub>3</sub>): δ 165.1, 153.9, 148.6, 139.6, 132.7, 130.5, 128.6, 128.3, 127.6, 127.2, 109.7, 106.4, 98.8, **72.5 (CH<sub>2</sub>)**, **61.3 (spiro ring carbon)**, 52.1, 44.4, 43.0, 41.3, 12.7; **IR** (film, cm<sup>-1</sup>) 3435, 2968, 2929, 2894, 2792, 1735, 1653, 1633, 1613, 1511, 1397, 1356, 1273, 1252, 1200, 1153, 1115; **HRMS** (FAB) *m/z* calcd for C<sub>32</sub>H<sub>39</sub>N<sub>5</sub>O<sub>2</sub> [(M+H)<sup>+</sup>] 526.3177; found 526.3175.

## Estimation of the ratio of the close to open form of probe 1

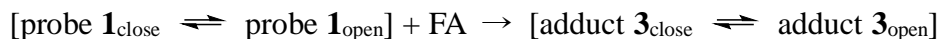

We assumed that the molar extinction coefficients of the close forms ( $\mathbf{1}_{\text{close}}$  and  $\mathbf{3}_{\text{close}}$ ) are similar, and those of the open forms ( $\mathbf{1}_{\text{open}}$  and  $\mathbf{3}_{\text{open}}$ ) are also similar, because of their same core structures.

$$\epsilon_{1c} (\text{probe } \mathbf{1}_{\text{close}}) \sim \epsilon_{3c} (\text{adduct } \mathbf{3}_{\text{close}})$$

$$\epsilon_{1o} (\text{probe } \mathbf{1}_{\text{open}}) \sim \epsilon_{3o} (\text{adduct } \mathbf{3}_{\text{open}})$$

We also assumed that the molar extinction coefficients for probe **1** ( $\epsilon = 10,540 \text{ M}^{-1} \text{ cm}^{-1}$ , see Table S1) and adduct **3** ( $\epsilon = 42,500 \text{ M}^{-1} \text{ cm}^{-1}$ , see Table S1) are originated from the corresponding single major form. In this case, the probe **1** is mainly present in the close form and the adduct **3** in the open form. Thus,

$$\epsilon_{1c} (\text{probe } \mathbf{1}_{\text{close}}) \sim \epsilon_{3c} (\text{adduct } \mathbf{3}_{\text{close}}) \sim \epsilon_1 = 10,540 \text{ M}^{-1} \text{ cm}^{-1}$$

$$\epsilon_{1o} (\text{probe } \mathbf{1}_{\text{open}}) \sim \epsilon_{3o} (\text{adduct } \mathbf{3}_{\text{open}}) \sim \epsilon_3 = 42,500 \text{ M}^{-1} \text{ cm}^{-1}$$

The maximum absorbance of probe **1** and adduct **3** was determined to be 0.158 and 0.371, respectively (see Figure S1).

$$\text{Absorption, } A = \epsilon bc, \quad b = 1 \text{ cm}, \quad c = 1.0 \times 10^{-5} \text{ M (10 } \mu\text{M)}$$

The close-open ratio coefficients:

$$c_{1c} + c_{1o} = 1, \quad c_{3c} + c_{3o} = 1$$

$$A_1 (\text{for probe } \mathbf{1}) = c_{1c} \times A_{1c} + c_{1o} \times A_{1o}$$

$$A_3 (\text{for adduct } \mathbf{3}) = c_{1c} \times A_{3c} + c_{1o} \times A_{3o}$$

For the close-open ratio of probe **1**:

$$A_1 = 0.158 = c_{1c} \times (\epsilon_1 \times 1 \text{ cm} \times 1.0 \times 10^{-5} \text{ M}) + c_{1o} \times (\epsilon_3 \times 1 \text{ cm} \times 1.0 \times 10^{-5} \text{ M})$$

$$0.158 = c_{1c} \times (10,540 \text{ M}^{-1} \times 10^{-5} \text{ M}) + c_{1o} \times (42,500 \text{ M}^{-1} \times 10^{-5} \text{ M})$$

$$0.158 = c_{1c} \times (0.10540) + c_{1o} \times (0.42500) \text{ ----- (1)}$$

$$c_{1c} + c_{1o} = 1, \quad c_{1o} = 1 - c_{1c} \text{ ----- (2)}$$

From eq (1) and (2),  $c_{1c} = 0.835$ ,  $c_{1o} = 0.164$

Therefore, probe **1** (close form)  $\sim 84\%$ , probe **1** (open form)  $\sim 16\%$

**Table S1.** Extinction coefficients, quantum yields and fluorescence outputs of compounds.

|          | $\phi_{fl}$ (%) | $\epsilon_{514}$ ( $M^{-1} cm^{-1}$ ) | Fluorescence Output ( $\phi_{fl} \times \epsilon_{514}$ ) |
|----------|-----------------|---------------------------------------|-----------------------------------------------------------|
| Probe 1  | 23              | 10,540                                | 2,424                                                     |
| Probe 2  | 28              | 815                                   | 228                                                       |
| Adduct 3 | 14              | 42,500                                | 5,950                                                     |

Quantum yield was determined using rhodamine B as a standard ( $\phi = 0.31$ ) according to the known procedure.<sup>5</sup>

The quantum yield was calculated according to the following equation:  $\phi_{sample} = \phi_{standard} (Grad_{sample}/Grad_{standard})(\eta_{sample}^2/\eta_{standard}^2)$

( $\phi$  = quantum yield,  $\phi_{standard} = 0.31$  in water, Grad = gradient from the plot of integrated fluorescence intensity versus absorbance,  $\eta$  = refractive index of the solvent).

Fluorescence output of each probe (“brightness”) is proportional to the product of the extinction coefficient (at the relevant excitation wavelength) and the fluorescence quantum yield.

## Cell Study

**Cell culture.** HeLa (human cervical cancer cells), MRC-5 (human fibroblast cell line derived from normal lung tissue), MCF-7 cells (human breast cancer cells) were purchased from Korean Cell Line Bank. HaCaT cells (human keratinocytes) were kindly provided from Dr. Sung-Hyun Ko's group (Chemical Biology Research Center, Korea Research Institute of Bioscience and Biotechnology (KRIBB)) and HEK293T cells (human embryonic kidney cells) from Professor Kiwon Song's group (College of Life Science and Biotechnology, Yonsei University). These cells were cultured in DMEM (Invitrogen) or RPMI (Invitrogen), supplemented with 10% fetal bovine serum (FBS), 50 units/mL penicillin and 50 units/mL streptomycin, were cultured at 37 °C with 5% CO<sub>2</sub> atmosphere.

**Cell imaging.** Confocal fluorescence microscopy images were obtained using a Zeiss laser scanning microscope (LSM 800 Carl Zeiss, Germany). Probes were excited at 561 nm and emission was collected between 570 and 720 nm. Hoechst 33342 was excited at 405 nm and emission was collected from 450 to 510 nm.

**Quantitation of fluorescence intensity in cells.** Fluorescence intensities in cells were quantified for each image using the mean region of interest (ROI) tool and ImageJ software. Specifically, a constant circular ROI was chosen to encompass cells of interest and the same ROI area size was used for background subtraction. All fluorescence intensities derived from confocal microscope images were averages of at least three independent experiments.

**Cell viability assay.** Cell viability was assessed by using a MTT ((3-(4,5-dimethylthiazol-2-yl)-2,5-diphenyltetrazolium bromide) assay. HeLa cells ( $5 \times 10^3$  cells/100  $\mu$ L) were plated in triplicate in 96-well plates for 24 h and were incubated with various concentrations of **1** in culture media. MTT (20  $\mu$ L of a 5 mg/mL solution) was added to culture media in each well and the resulting mixtures were incubated for 2 h. After removing culture media containing MTT, 100  $\mu$ L of DMSO was added and the cells were incubated for 30 min for color development. Absorbance at 590 nm was measured using an Infinite® 200 PRO multimode microplate reader (Tecan, Switzerland).

## Supplementary References

1. Brown, Michael John, PhD Thesis, “Synthesis, structure and functionalisation of 1,2-diazetidines”, University of Warwick, 2011.
2. B. Biswal, D. Mallick and B. Bag, *Org. Biomol. Chem.*, 2016, **14**, 2241.
3. T. F. Brewer and C. J. Chang, *J. Am. Chem. Soc.*, 2015, **137**, 10886.
4. M. Kim, S. –K. Ko, H. Kim, I. Shin and J. Tae, *Chem. Commun.*, 2013, **49**, 7959.
5. D. Magde, G.E. Rojas and P.G. Seybold, *Photochem. Photobiol.* 1999, **70**, 737.
6. K. J. Bruemmer, R. R. Walvoord, T. F. Brewer, G. Burgos-Barragan, N. Wit, L. B. Pontel, K. J. Patel and C. J. Chang, *J. Am. Chem. Soc.*, 2017, **193**, 5338.

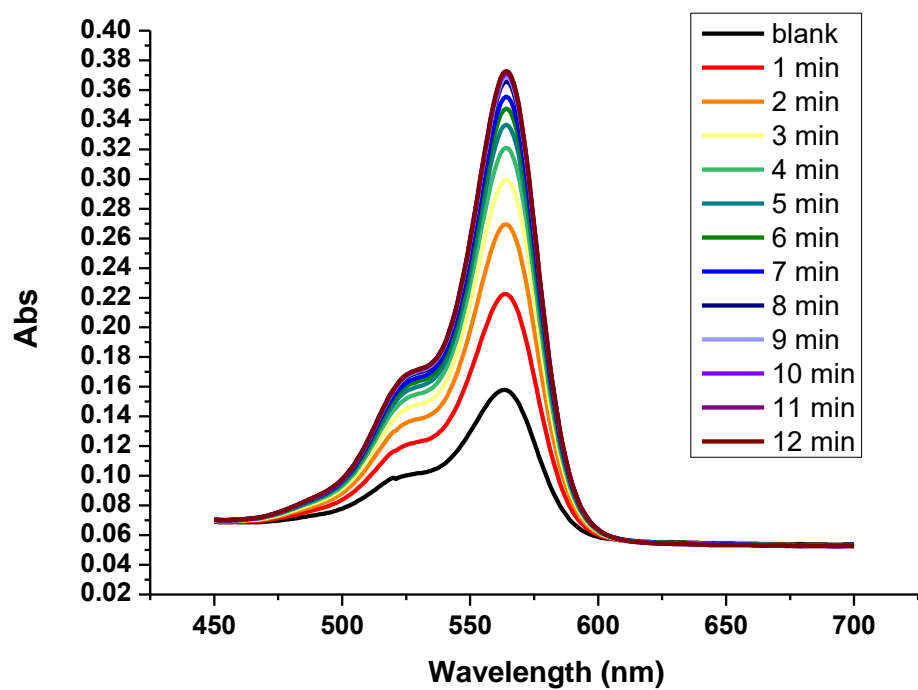

**Figure S1.** Time-dependent changes of the UV-VIS absorption spectra of **1** (10 μM) promoted by addition of 10 equiv FA in PBS buffer (1% DMSO, pH 7.4) at 37 °C.

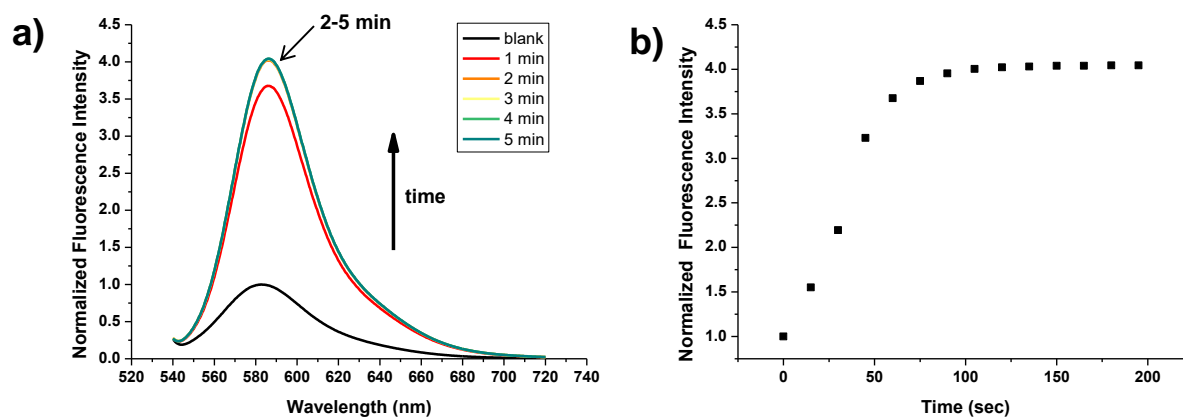

**Figure S2.** (a) Time-dependent change of the fluorescence spectra of **2** (10  $\mu$ M) promoted by addition of 10 equiv FA in PBS buffer (1% DMSO, pH 7.4) at 37  $^{\circ}$ C ( $\lambda_{\text{ex}} = 520$  nm). (b) A plot corresponding to the time-dependent increase in fluorescence intensity of **2** following addition of FA ( $\lambda_{\text{ex}}/\lambda_{\text{em}} = 520/583$  nm).



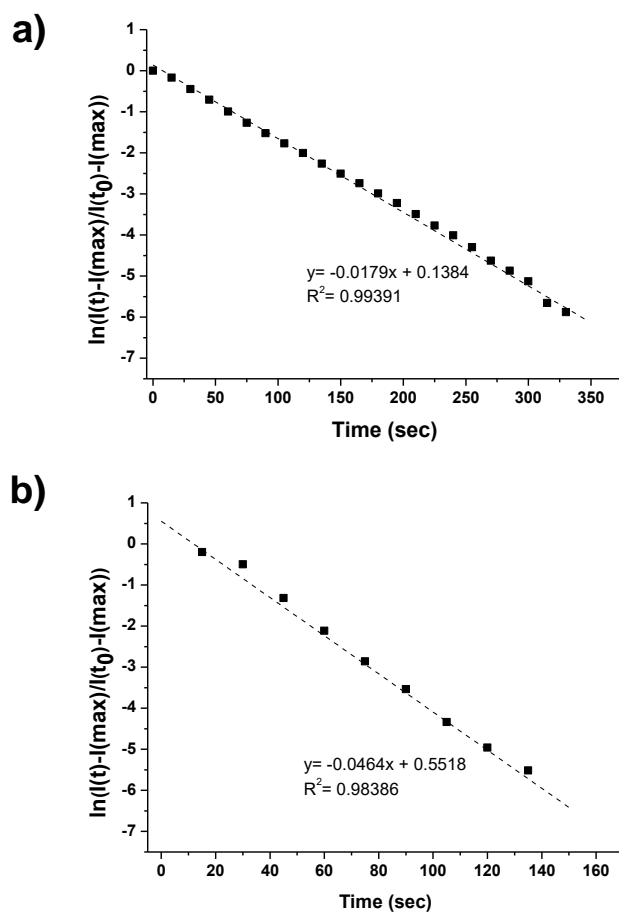

**Figure S3.** The plots of pseudo-first-order kinetics and linearized integrated rate law of (a) **1** (10  $\mu\text{M}$ ) and (b) **2** (10  $\mu\text{M}$ ) upon additions of FA (10 equiv) in PBS buffer (1% DMSO, pH 7.4) at 37  $^\circ\text{C}$  ( $\lambda_{\text{ex}}/\lambda_{\text{em}} = 520/583 \text{ nm}$ ) (see Supplementary ref. 6).

The calculated rate constants are

$$k = 1.8 \times 10^{-2} \text{ M}^{-1}\text{s}^{-1} \text{ for probe 1}$$

$$k = 4.6 \times 10^{-2} \text{ M}^{-1}\text{s}^{-1} \text{ for probe 2}$$

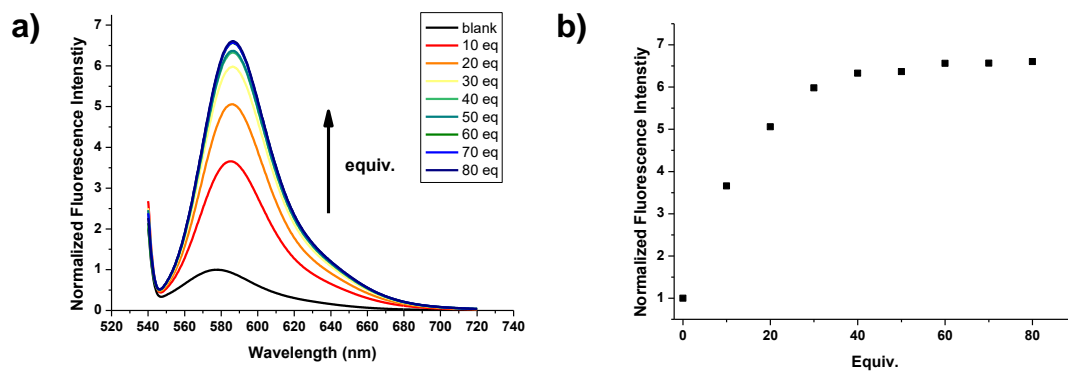

**Figure S4.** (a) FA concentration-dependent changes of the fluorescence spectra of **2** (10 μM), 10 min after each addition of FA ( $\lambda_{\text{ex}} = 520$  nm). (b) FA concentration-dependent increase in fluorescence intensity of **2** (10 μM) ( $\lambda_{\text{ex}}/\lambda_{\text{em}} = 520/583$  nm).

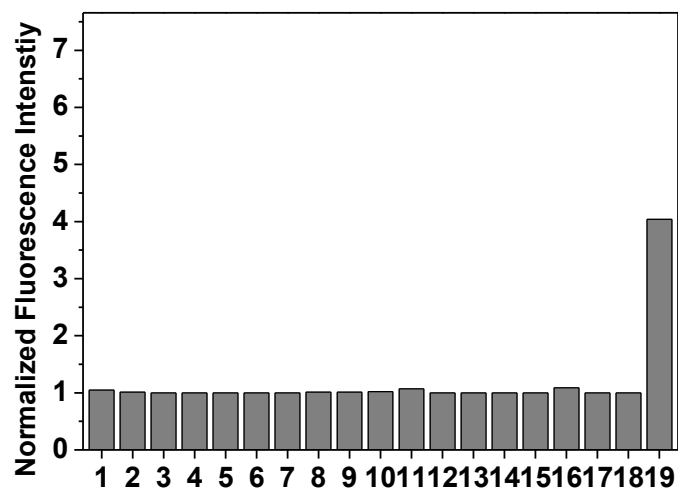

**Figure S5.** Change of fluorescence intensity of **2** (10  $\mu\text{M}$ ) at 583 nm ( $\lambda_{\text{ex}} = 520$  nm) promoted by addition of each of the biologically relevant analytes (10 equiv) in PBS buffer (1% DMSO, pH 7.4) at 37  $^{\circ}\text{C}$ . Numbering of the analytes in the graph is as follows: 1, acetaldehyde; 2, benzaldehyde; 3, 4-hydroxybenzaldehyde; 4, ethyl pyruvate; 5, ethyl glyoxalate; 6, propionaldehyde; 7, D-glucose (1 mM); 8,  $\text{H}_2\text{O}_2$ ; 9, HOCl; 10,  $\text{NO}^{\cdot}$ ; 11,  $^1\text{O}_2$ ; 12,  $\text{O}_2^{\cdot-}$ ; 13,  $\cdot\text{OH}$ ; 14,  $\text{Cu}^{2+}$ ; 15,  $\text{Fe}^{2+}$ ; 16,  $\text{Fe}^{3+}$ ; 17,  $\text{K}^+$ ; 18,  $\text{Zn}^{2+}$ ; 19, FA.

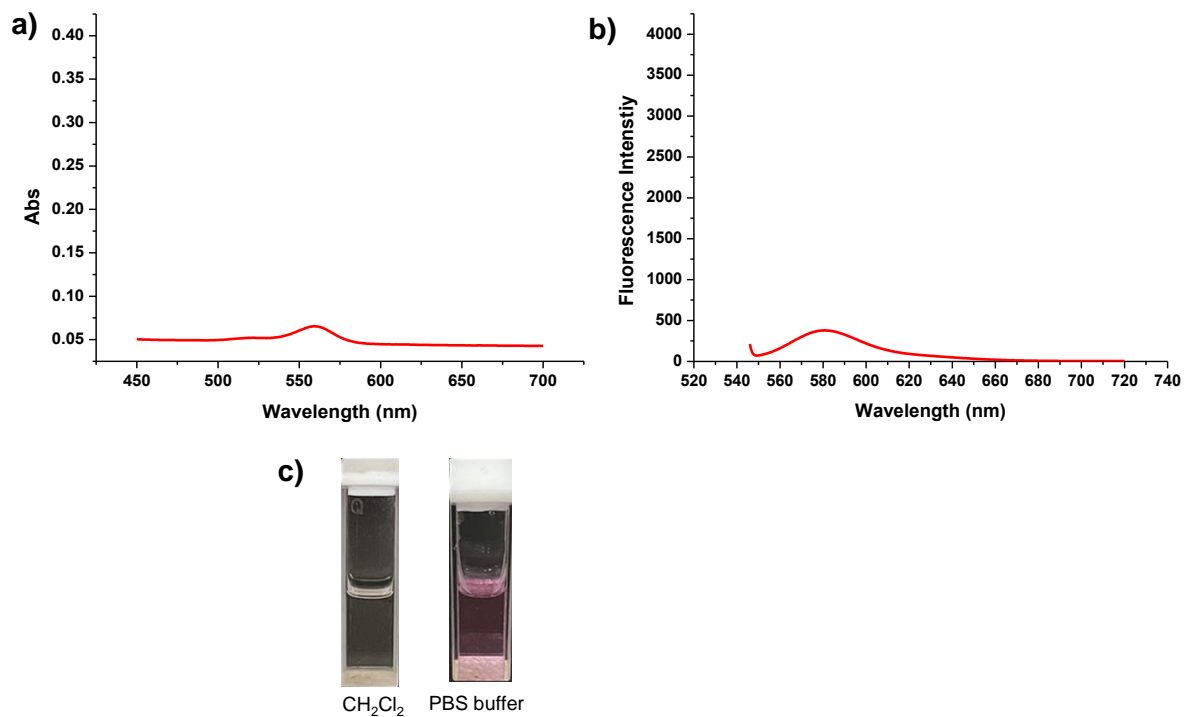

**Figure S6.** (a) UV-Vis absorption and (b) fluorescence spectra ( $\lambda_{\text{ex}} = 520 \text{ nm}$ ) of the isolated product ( $10 \mu\text{M}$ ) in  $\text{CH}_2\text{Cl}_2$ . (c) Colors of the isolated adduct ( $10 \mu\text{M}$ ) in  $\text{CH}_2\text{Cl}_2$  and PBS buffer.

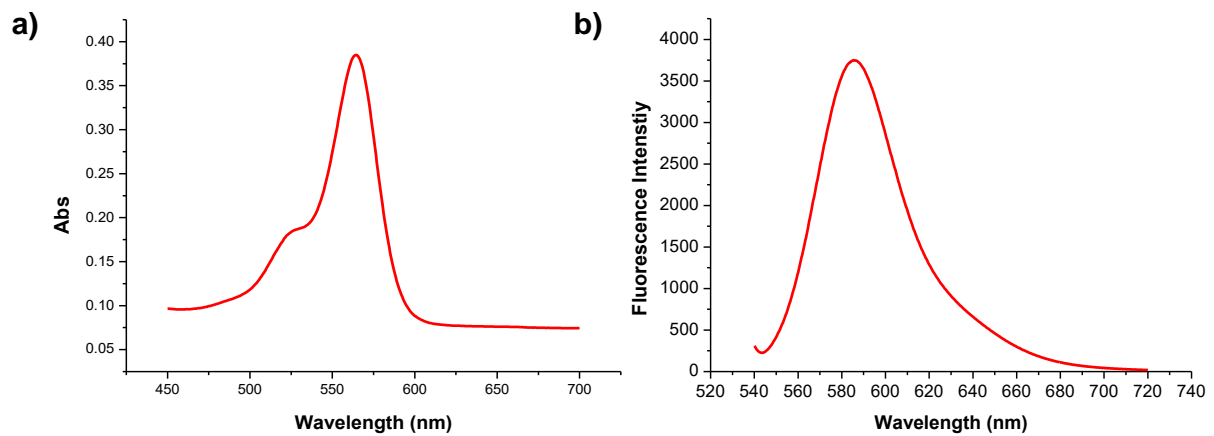

**Figure S7.** (a) UV-Vis absorption and (b) fluorescence spectra ( $\lambda_{\text{ex}} = 520$  nm) of the isolated adduct (10  $\mu\text{M}$ ) in PBS buffer (1% DMSO, pH 7.4).

### Probe 1

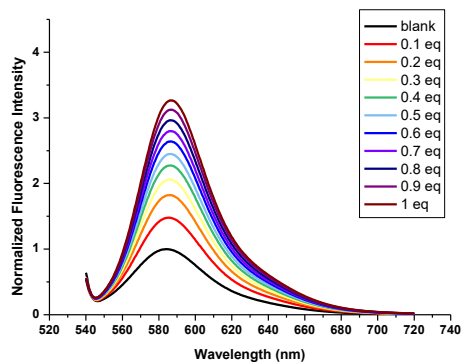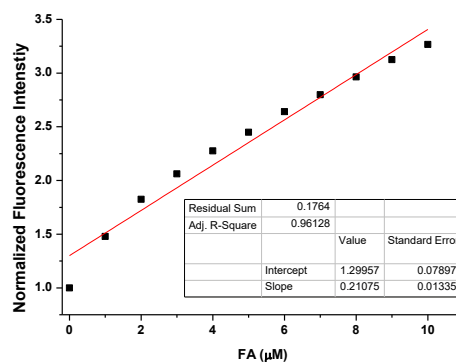

### Probe 2

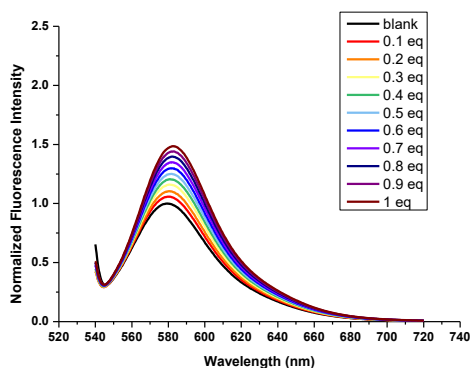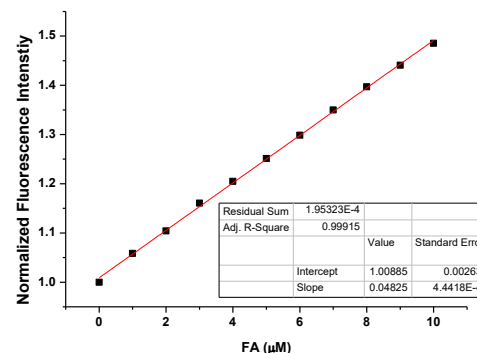

**Figure S8.** The limits of detection of **1** (10 μM) and **2** (10 μM) were measured by addition of 0.1 equiv FA in PBS buffer (1% DMSO, pH 7.4) at 37 °C ( $\lambda_{ex}/\lambda_{em} = 520/583$  nm). The limit of detection (LOD) was calculated using the equation,  $LOD = 3.3(Sy/S)$ , where  $Sy$  is the standard deviation of the response of the curve, and  $S$  is a slope of the calibration curve. (The limits of detection of **1** and **2** for FA have been calculated to be 1.24 μM and 0.59 μM, respectively.)

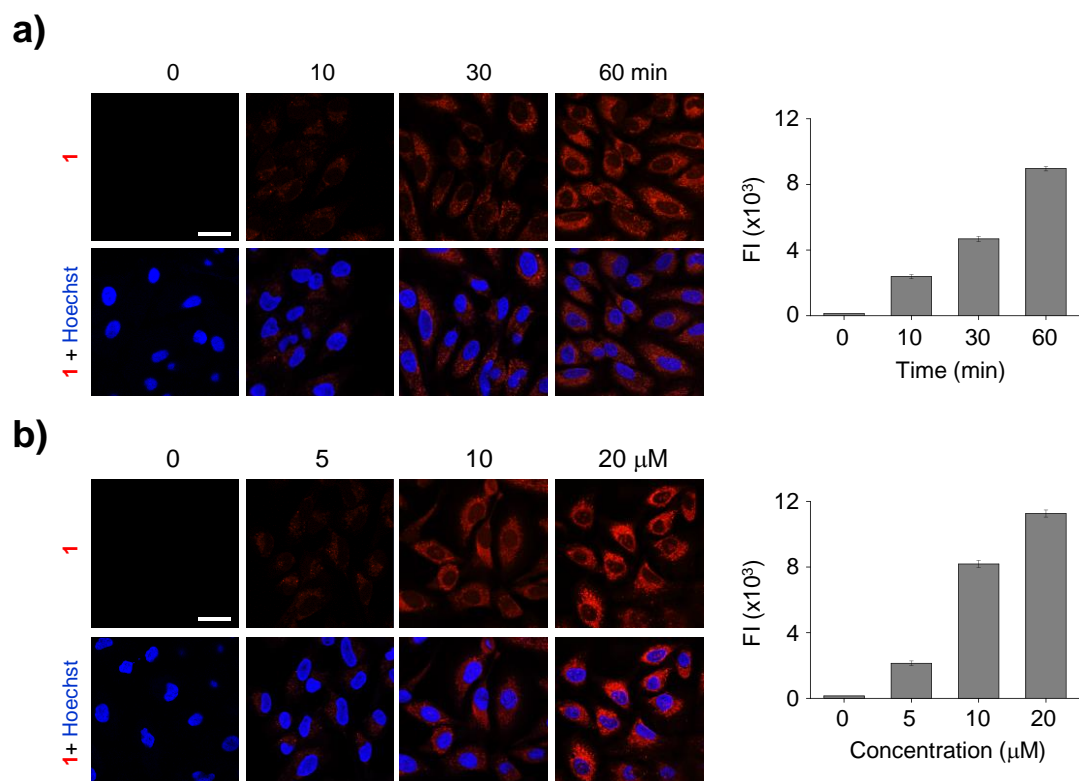

**Figure S9.** Time and concentration-dependent responses of **1** to FA in cells. HeLa cells were incubated with (a) 10  $\mu\text{M}$  **1** for the indicated times and (b) the indicated concentrations of **1** for 1 h. Cell images were obtained using confocal fluorescence microscopy (scale bar = 10  $\mu\text{m}$ ). The nucleus was stained with Hoechst 33342. Graphs show fluorescence intensities (FI) in cells treated with **1** (mean  $\pm$  s.d.,  $n = 3$ ).

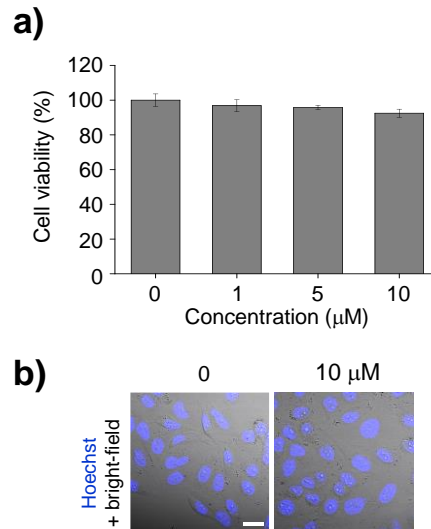

**Figure S10.** (a) HeLa cells were incubated with indicated concentrations of **1**. Cell death was measured by means of a MTT assay (mean  $\pm$  s.d.,  $n = 3$ ). (b) HeLa cells were incubated with 10  $\mu\text{M}$  **1** followed by treatment with 1  $\mu\text{M}$  Hoechst 33342. Cell images were obtained using confocal fluorescence microscopy (scale bar = 10  $\mu\text{m}$ ).



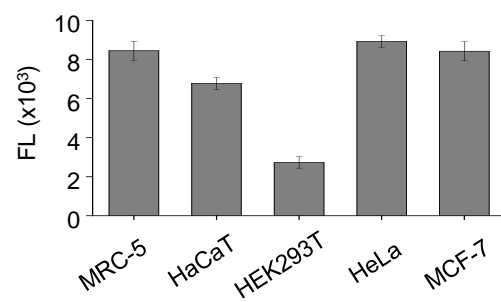

**Figure S11.** Measurement of endogenous FA in cell lysates using probe **1**. Lysates of each cells were incubated with **1** (10  $\mu$ M) for 1 h (mean  $\pm$  s.d., n = 3).

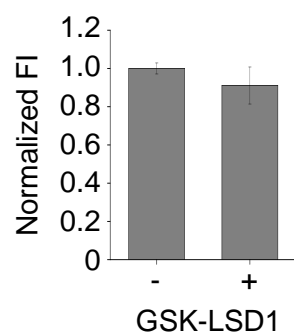

**Figure S12.** The effect of an inhibitor on LSD1-promoted generation of FA in cells. MCF-7 cells were incubated with or without 1  $\mu$ M GSK-LSD1 for 20 h. Cell lysates were incubated with **1** (10  $\mu$ M) for 1 h. A graph shows the normalized fluorescence intensity (mean  $\pm$  s.d., n = 3).

# <NMR spectra>

## Compound S3

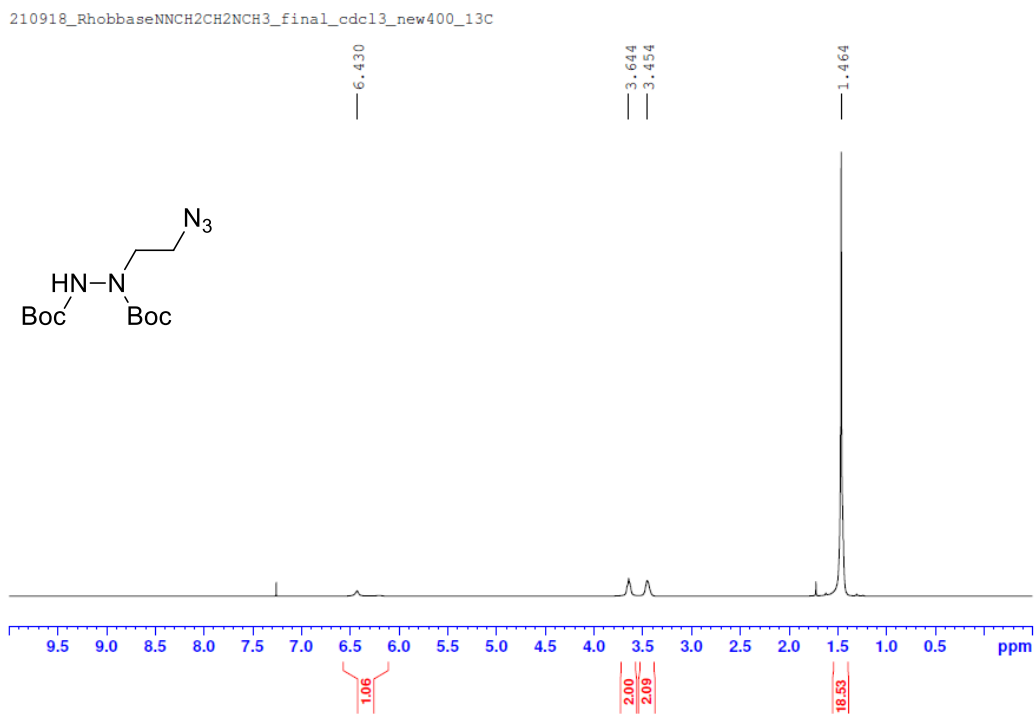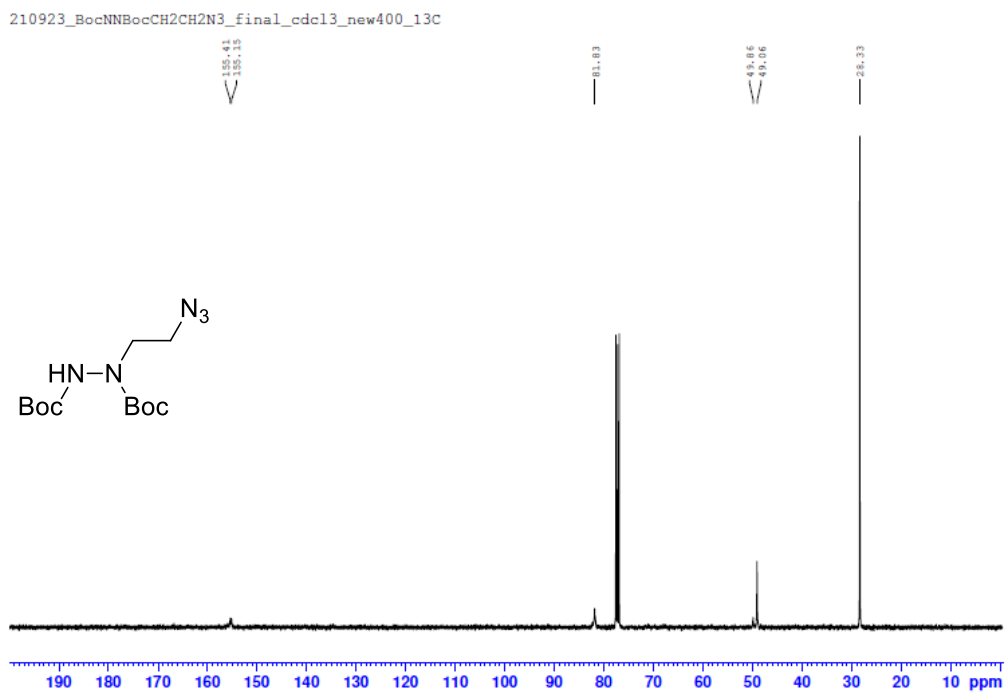

# Compound S4

210923\_BocNNBocCH2CH2NH2\_final\_cdcl3\_new400\_1H

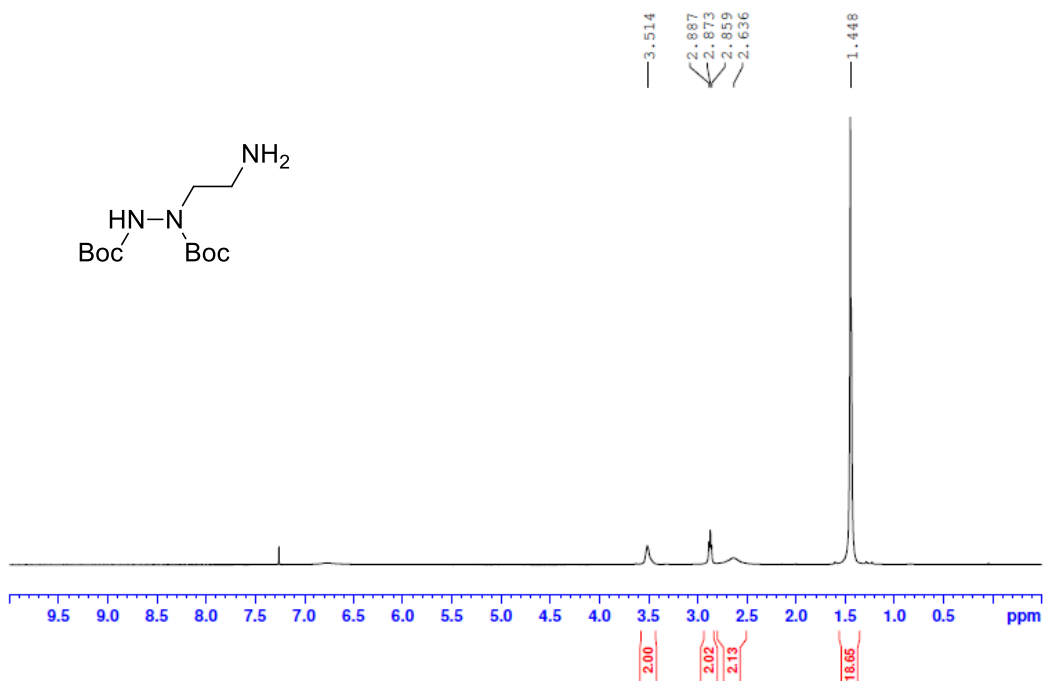

210923\_BocNNBocCH2CH2NH2\_final\_cdcl3\_new400\_13C

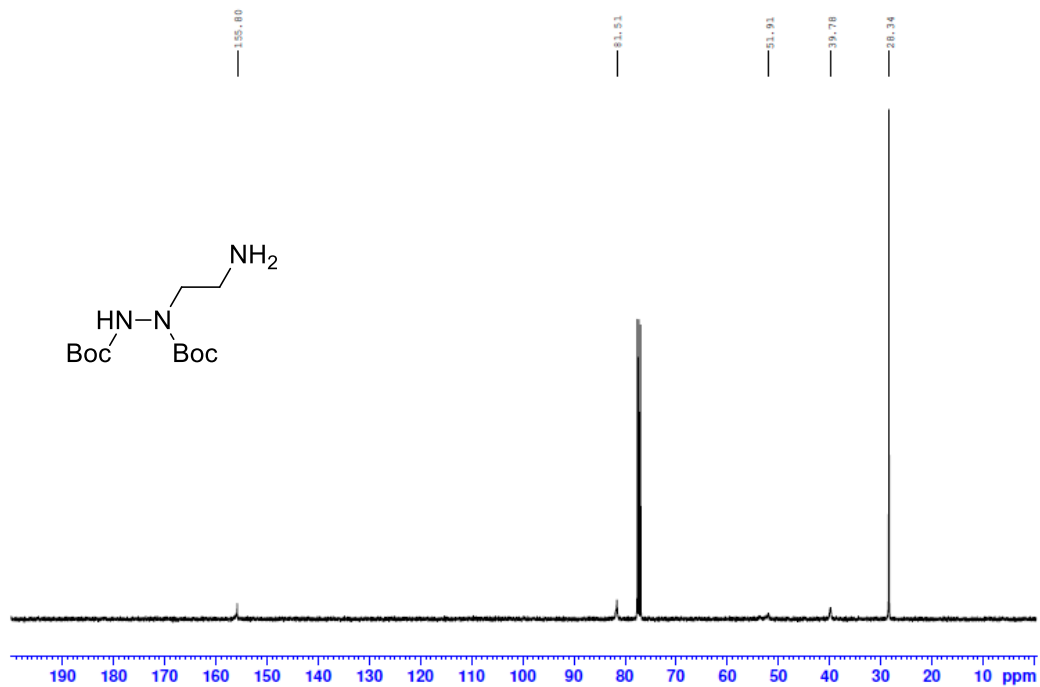

# Compound S5

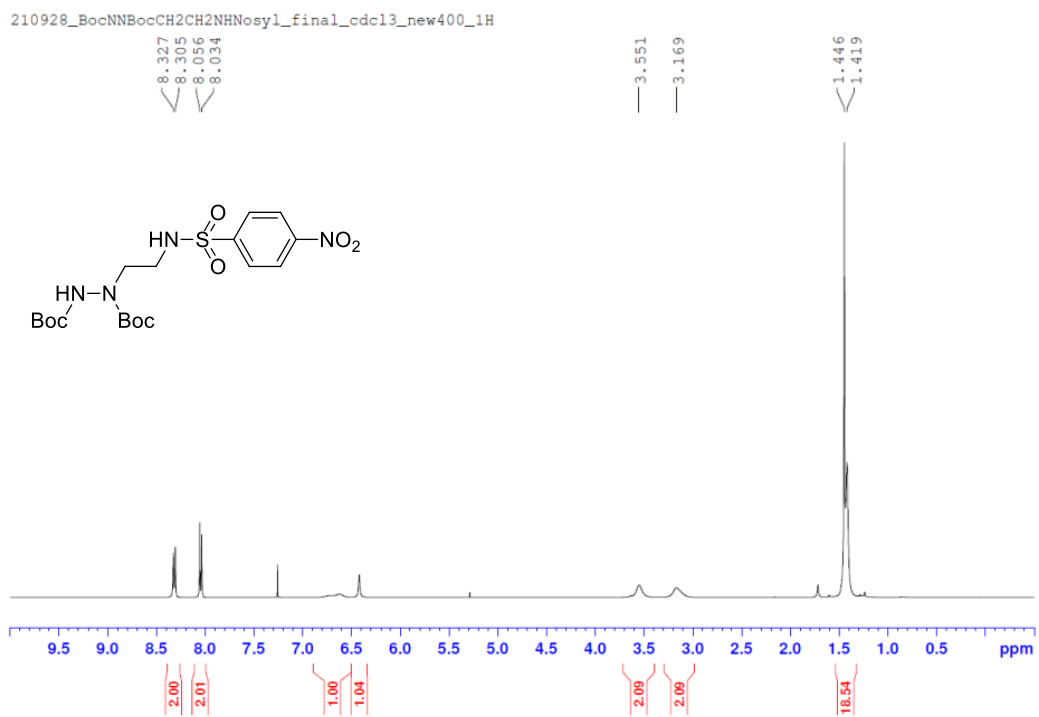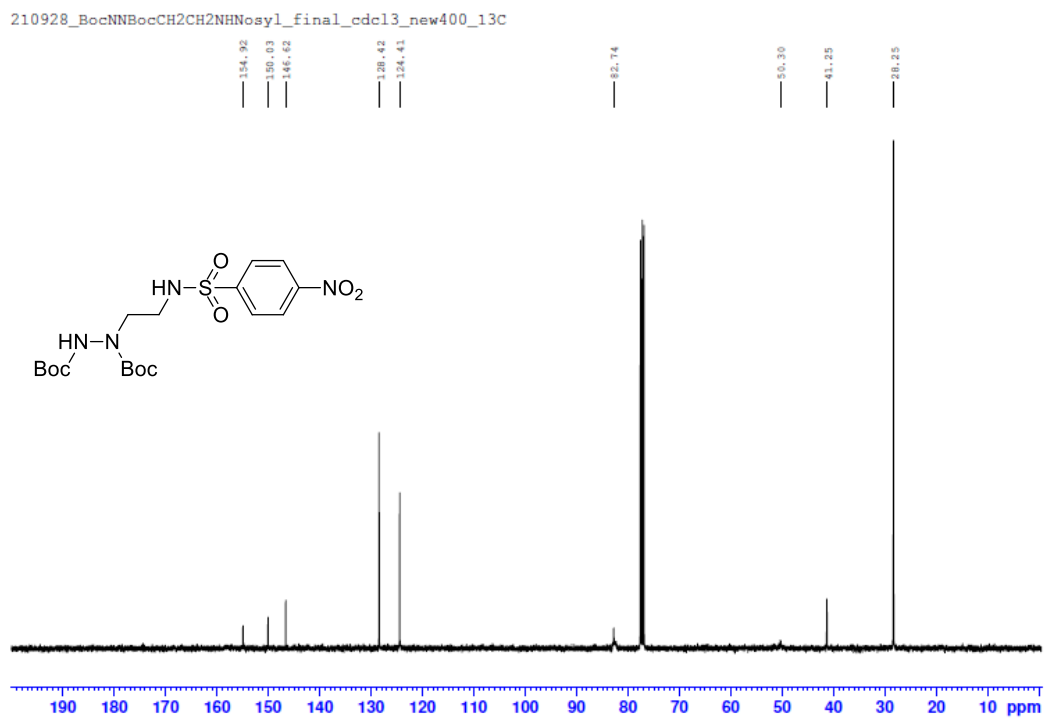

# Compound S6

210923\_BocNNBocCH2CH2NCH3Nosyl\_final\_cdcl3\_new400\_1H

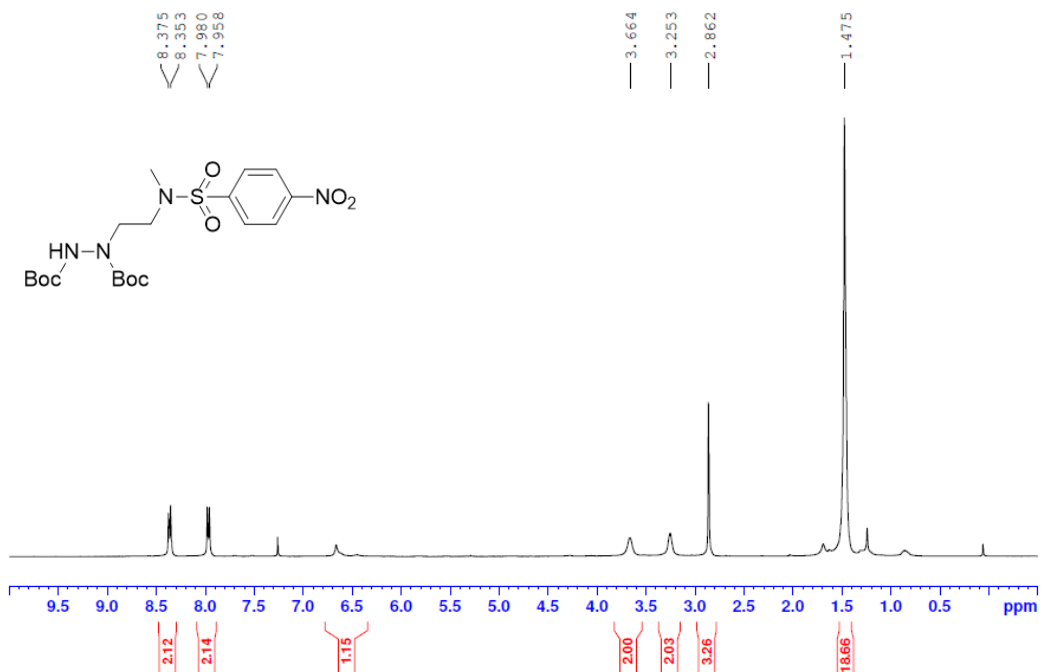

210923\_BocNNBocCH2CH2NCH3Nosyl\_final\_cdcl3\_new400\_13C

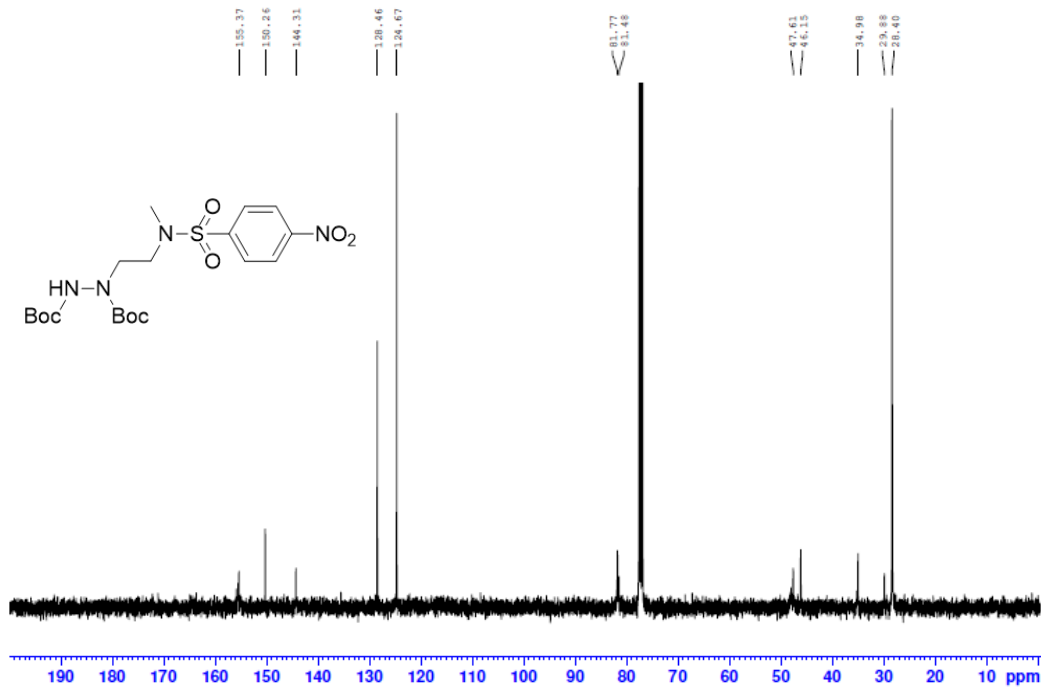

# Compound S8

211026\_Rhobase\_NNCCNCH3Nosyl\_check\_cdcl3\_new400\_1H

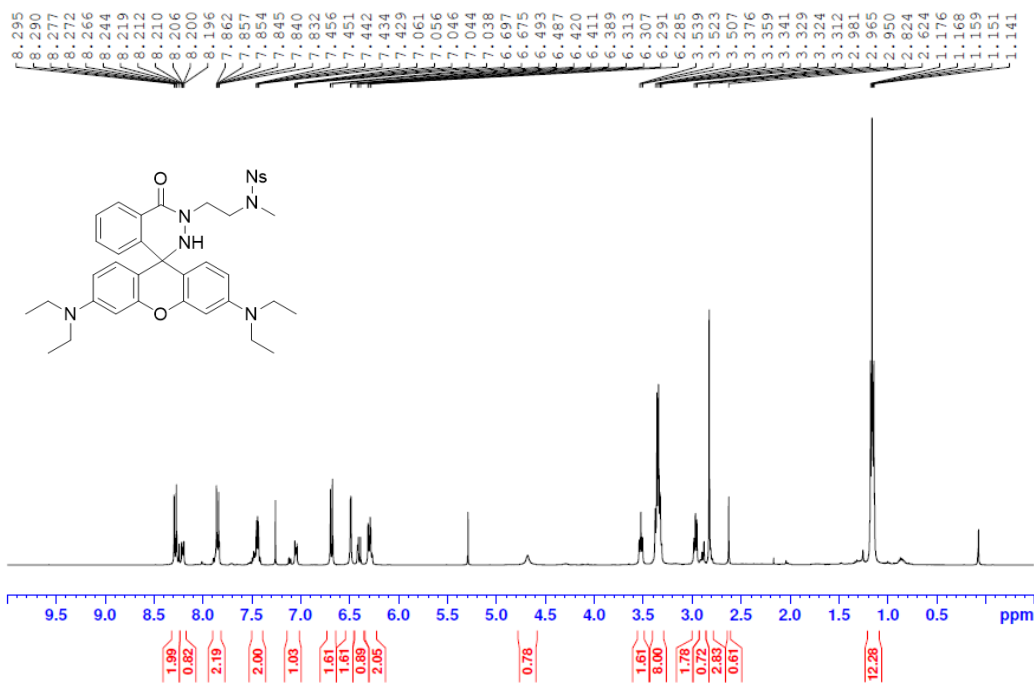

211026\_Rhobase\_NNCCNCH3Nosyl\_check\_cdcl3\_new400\_13C

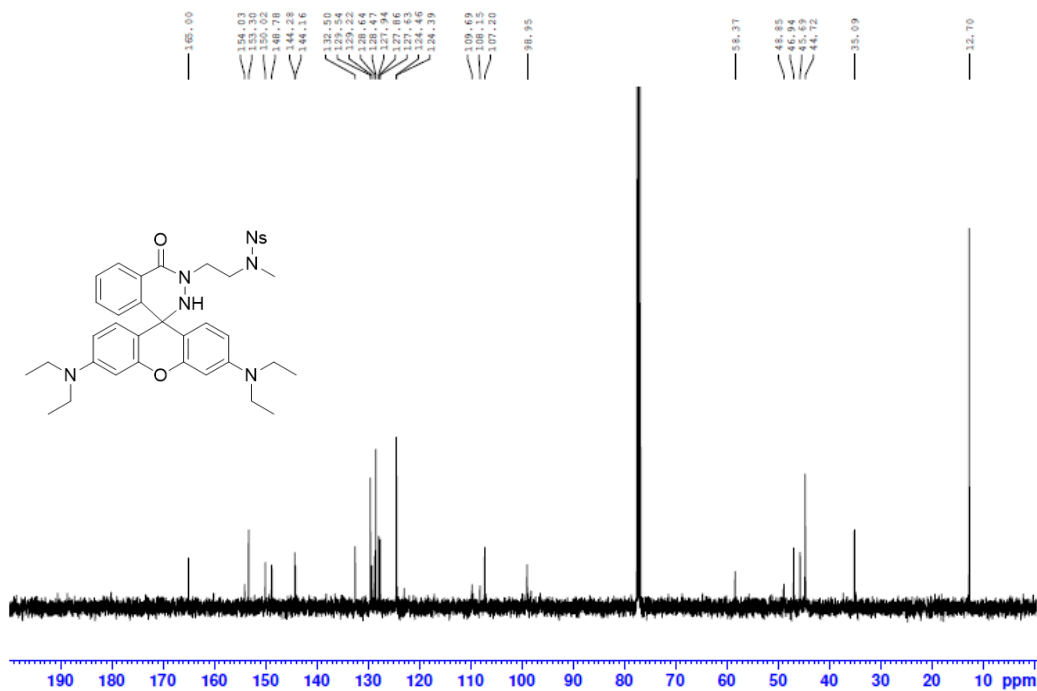

# Probe 1

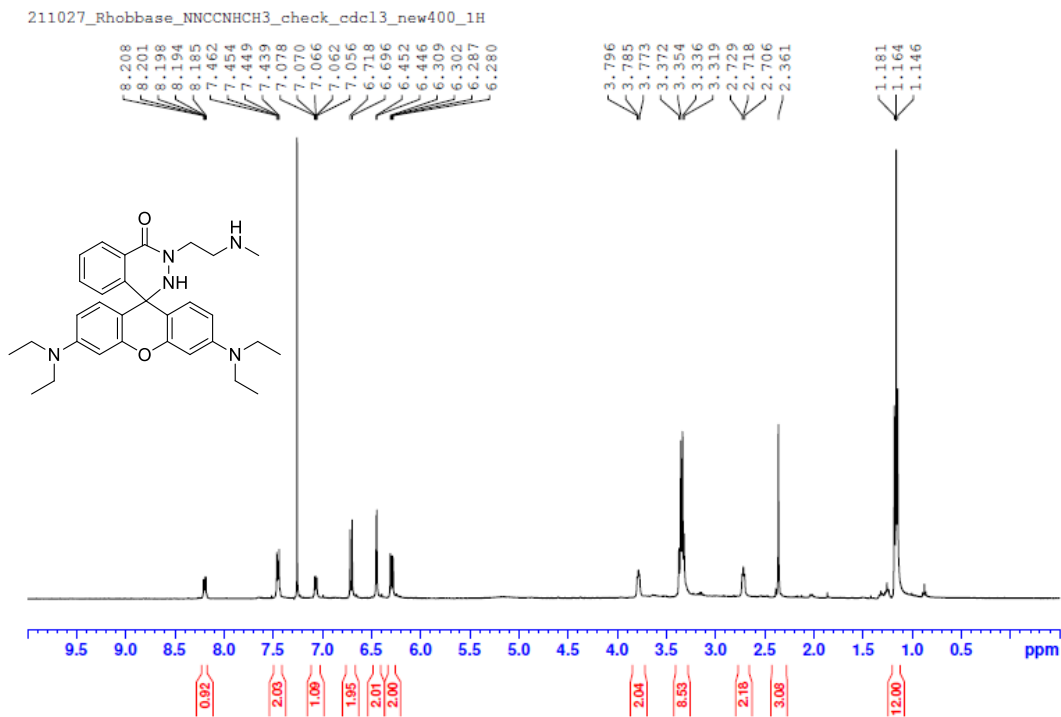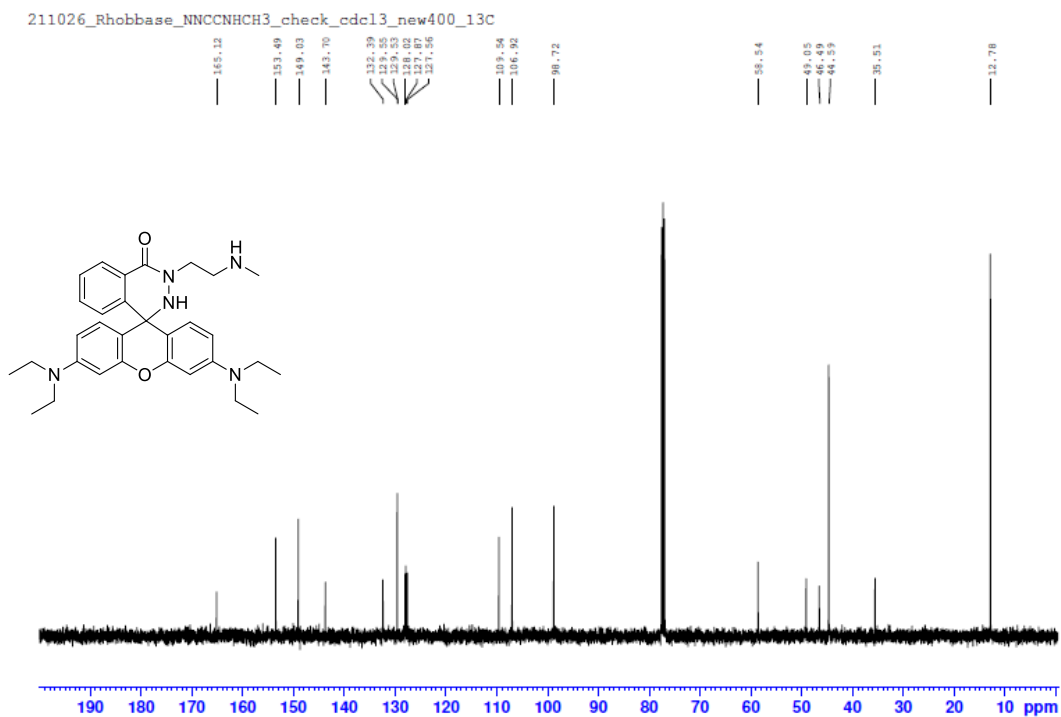



# Compound S10

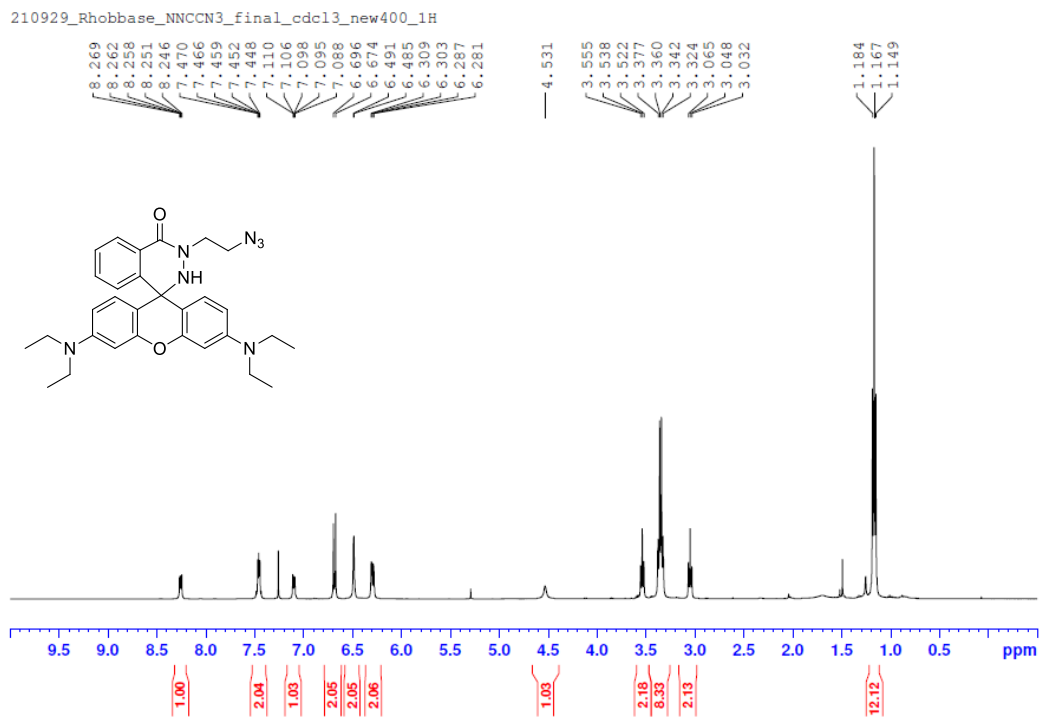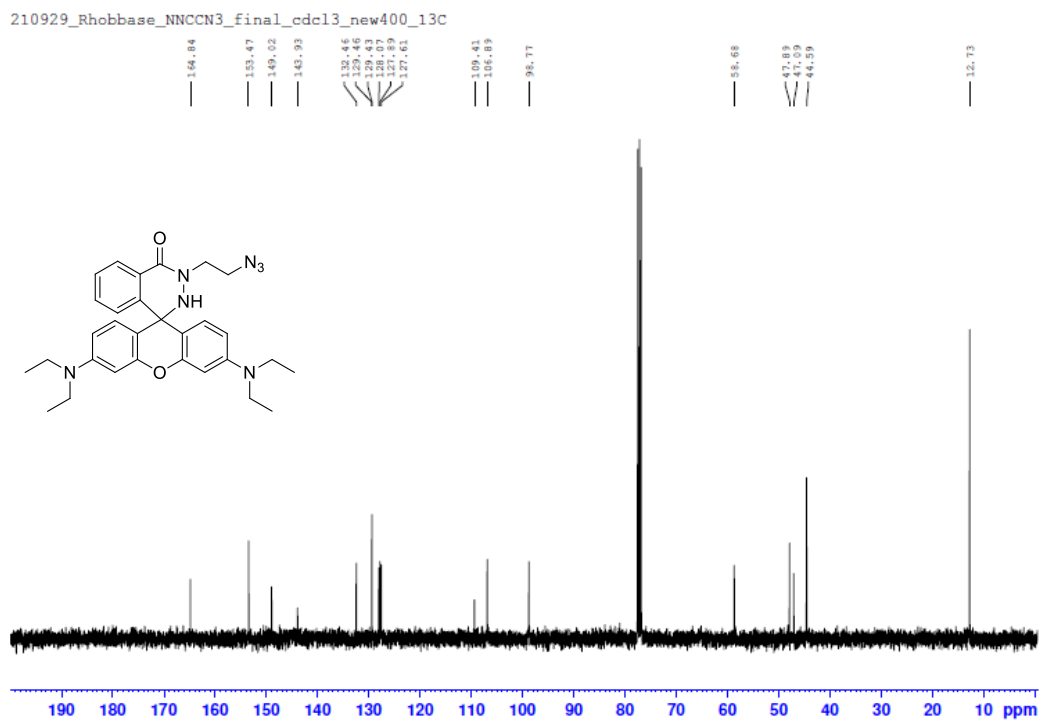

# Probe 2

20210202\_Rhobbase\_NNCCNH2\_6ring\_2nd\_CDCl3\_1H\_new400Mhz

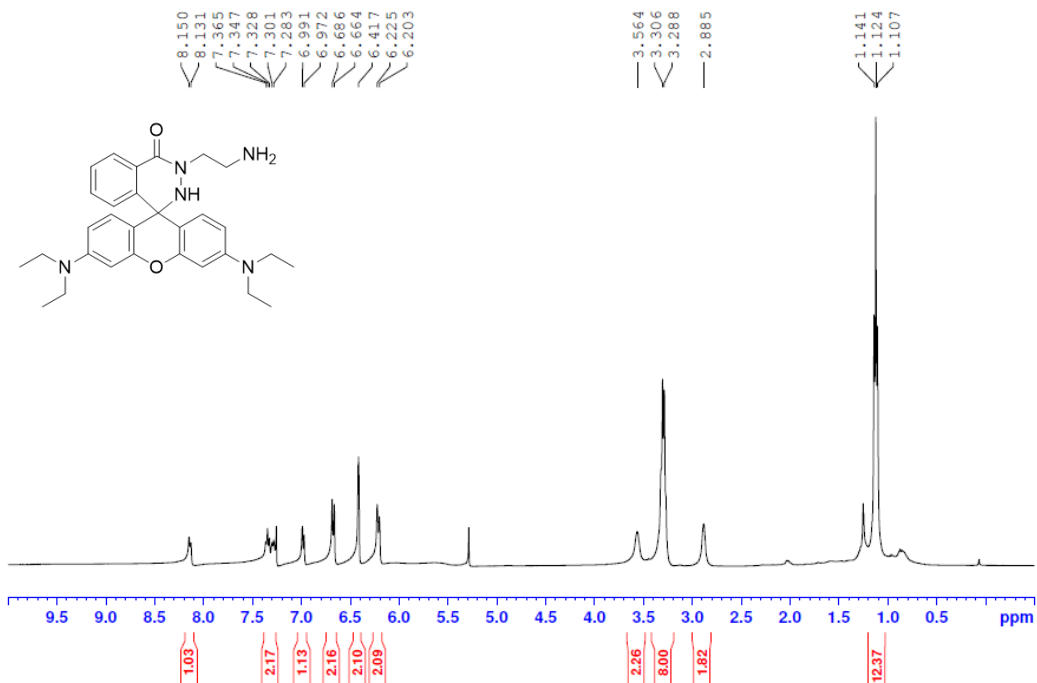

211007\_Rhobbase\_NNCCNH2\_final\_cdcl3\_new400\_13C

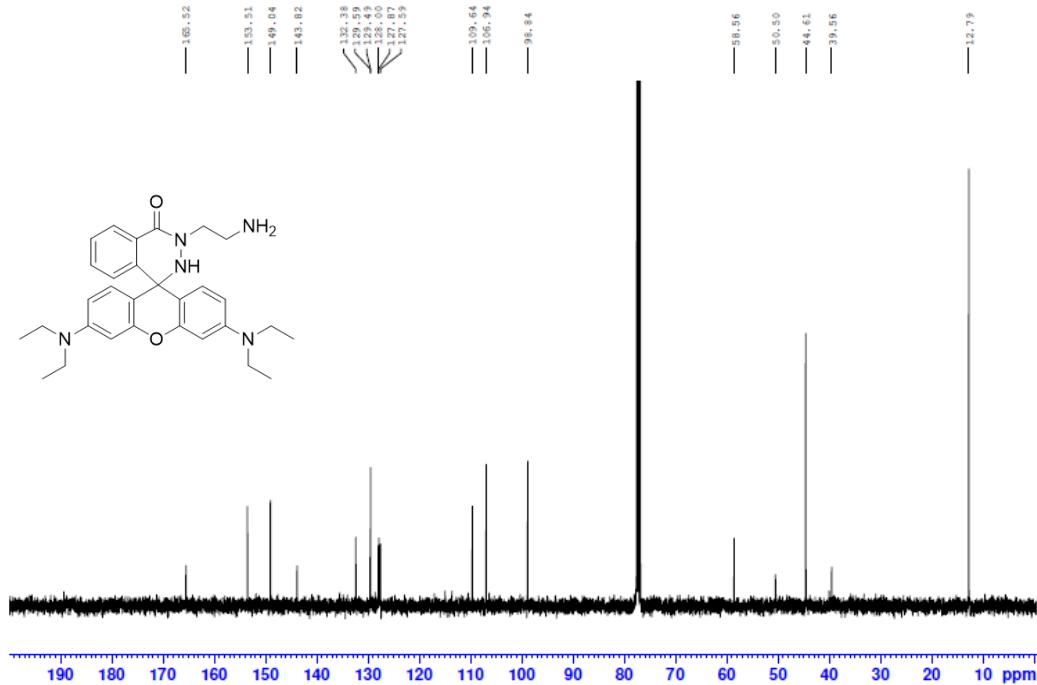

# 5-Membered Azide: Compound S11

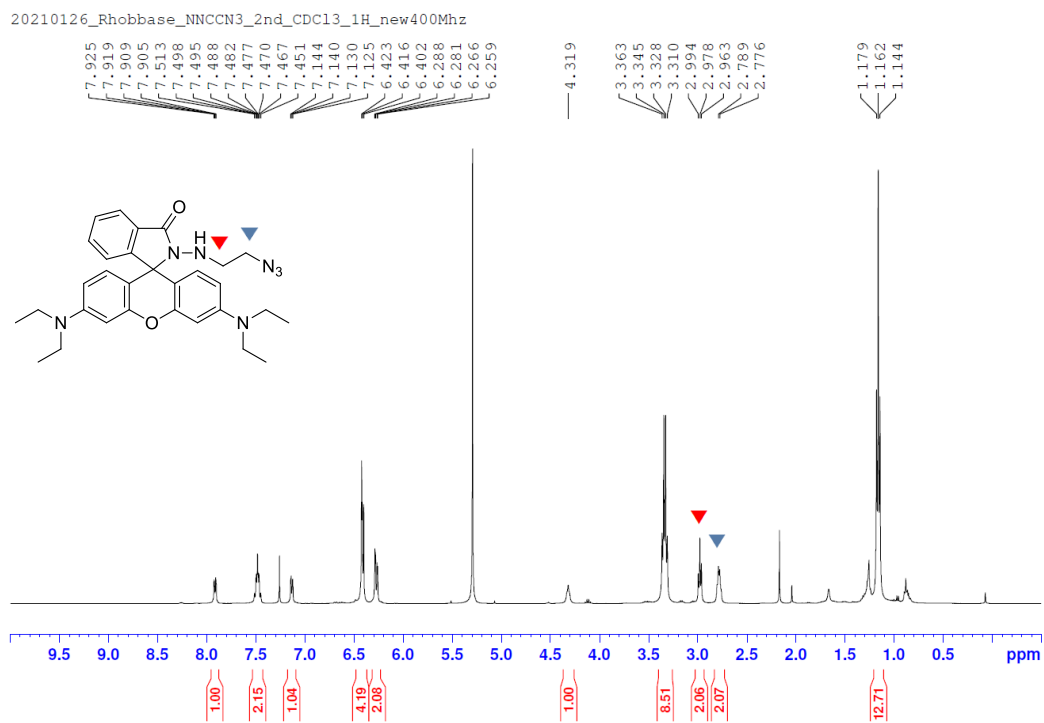

# 5-Membered Amine: Compound S12

20210202\_Rhobbase\_NNCCNH2\_5ring\_1st\_CDCl3\_1H\_new400Mhz

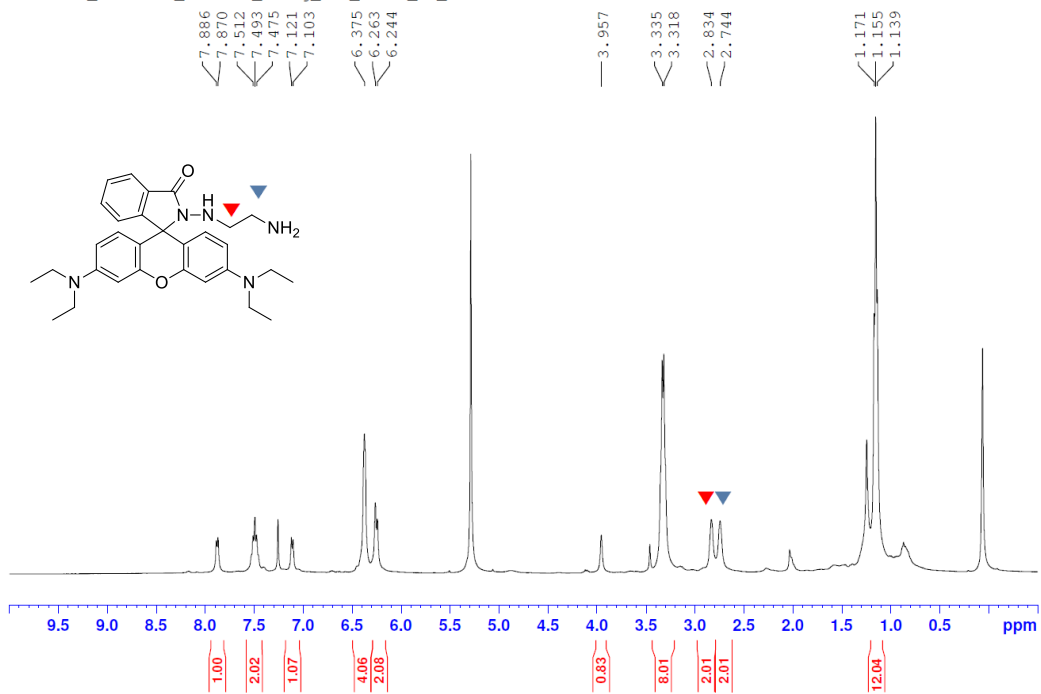

220531\_Rhobbase\_NNCH2CH2NH2\_5ring\_cdcl3\_new400\_13C

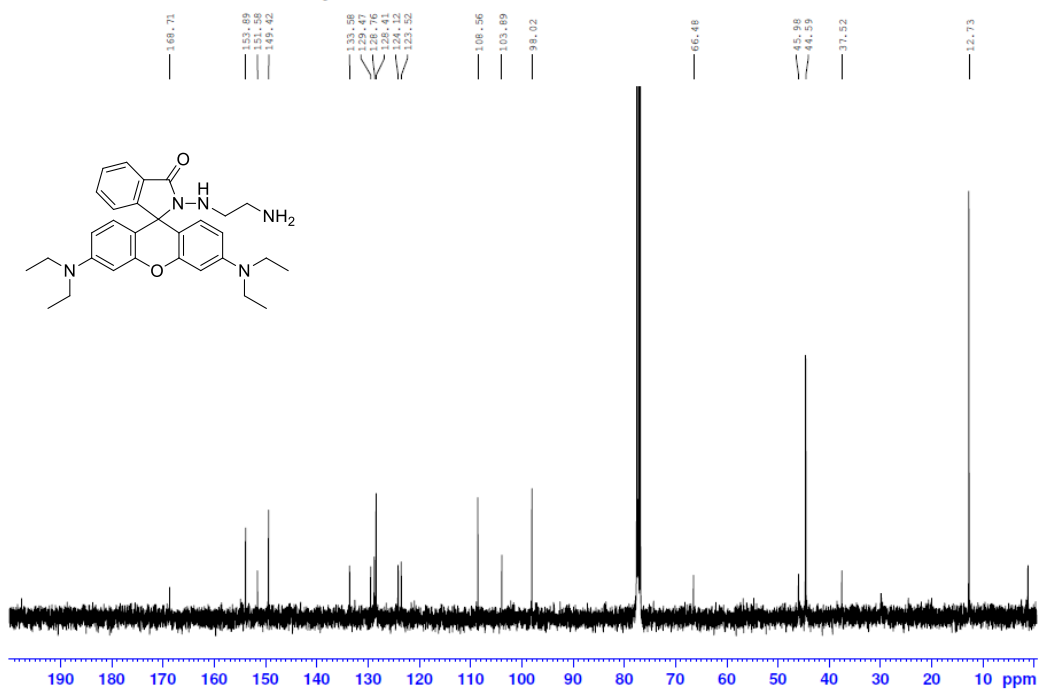

# Adduct 3 in CDCl<sub>3</sub>

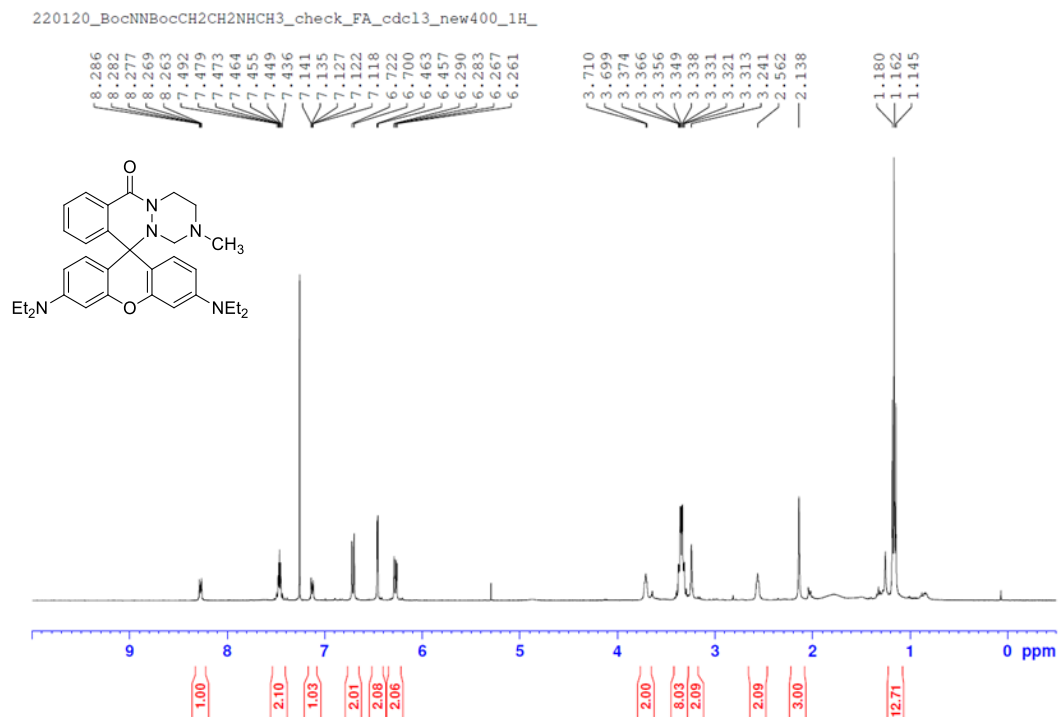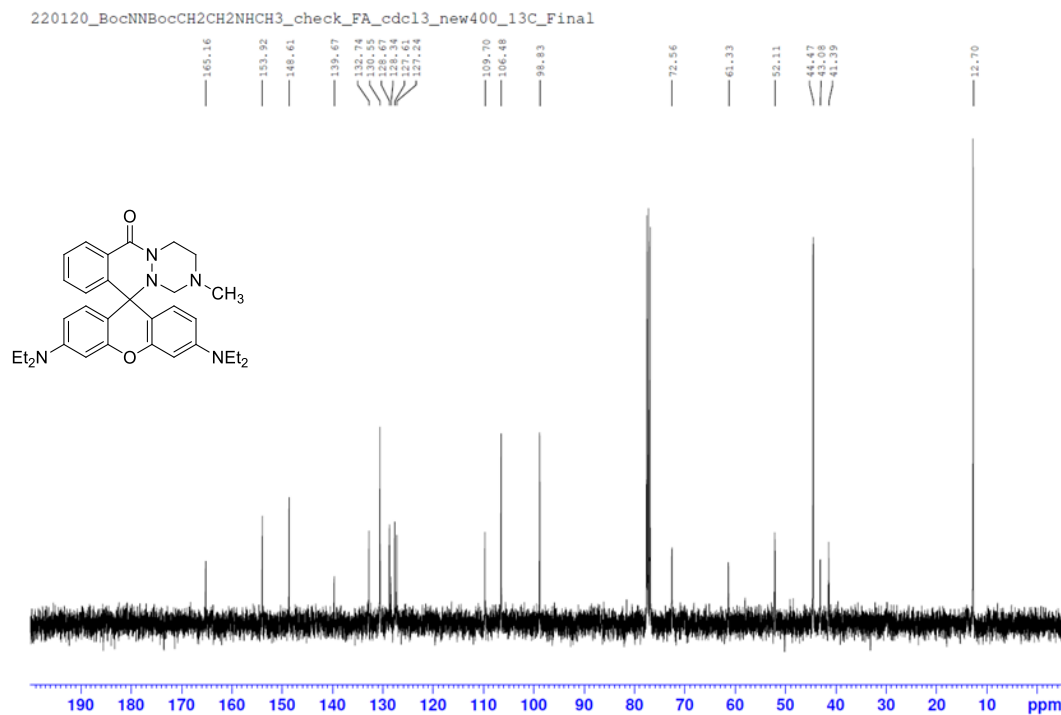

Supplement: d2ra02104h1.pdf [file d2ra02104h1.pdf]
